# Supplementary material
Source: publisher site journal article supplement (https://www.dovepress.com/article/supplementary_file/548388/548388%20Revised%20supplementary%20materials.xlsx)
Supplement: Supplementary file 1 [file 548388%20Revised%20supplementary%20materials.xlsx]

## Sheet: B0
	BLOCK 0: PATHOLOGIES AND TREATMENTS
	Totals	52
	Anesthesiology, Resuscitation and Pain Management	26
	Orthopedic Surgery and Traumatology	9
	Physical Medicine and Rehabilitation	13
	Rheumatology	4
	Weighted average	52
	Totals	← Choose the results to display
		5	4	3	2	1
	Musculoskeletal pain. Low back pain - Lumbago (facet, discogenic, myofascial, etc.)	0.692308	0.134615	0	0	0.173077		Yes
	Musculoskeletal pain. Pain in thoracic spine - Dorsalgia	0.0769231	0.326923	0.211538	0.153846	0.230769		No
	Musculoskeletal pain. Cervicalgia - Neck pain	0.384615	0.307692	0.0961538	0.0384615	0.173077		No
	Musculoskeletal pain. Musculotendinous, ligamentous and/or peripheral bursal pain	0.576923	0.25	0.173077	0	0		Yes
	Musculoskeletal pain. Peripheral joint pain: knee, shoulder, elbow, ankle, etc.	0.653846	0.25	0.0576923	0.0384615	0		Yes
	Neuropathic pain. Central	0.0769231	0.192308	0.192308	0.0769231	0.461538		No
	Neuropathic pain. Peripheral neuropathy	0.115385	0.423077	0.384615	0.0769231	0		No
	Neuropathic pain. Peripheral polyneuropathy	0	0.0576923	0.403846	0.365385	0.173077		No
	Neuropathic pain. Chronic painful polyneuropathy	0	0.0961538	0.307692	0.307692	0.288462		No
	Neuropathic pain. Chronic painful radiculopathy	0.326923	0.423077	0.0576923	0.192308	0		Yes
	Neuropathic pain. Complex Regional Pain Syndrome (CRPS) (Primary Chronic Pain according to ICD-11)	0.0192308	0.153846	0.211538	0.307692	0.307692		No
	Rehabilitation treatments. Hyperbaric chamber	0	0.0192308	0	0.0576923	0.923077		No
	Rehabilitation treatments. Cryotherapy	0.115385	0.0576923	0.0961538	0.153846	0.576923		No
	Rehabilitation treatments. Physiotherapy - manual therapy	0.153846	0.365385	0.173077	0.0384615	0.269231		No
	Rehabilitation treatments. Magnetotherapy	0.0961538	0.0769231	0.173077	0.173077	0.480769		No
	Rehabilitation treatments. Shock waves	0.0769231	0.346154	0.115385	0.134615	0.326923		No
	Rehabilitation treatments. Dry needling	0.0576923	0.211538	0.153846	0.115385	0.461538		No
	Rehabilitation treatments. Acupuncture	0.0192308	0	0.0769231	0.173077	0.730769		No
	Rehabilitation treatments. Radiofrequency	0.346154	0.269231	0.0576923	0.0576923	0.269231		No
	Rehabilitation treatments. Hydrotherapy	0.0384615	0.0576923	0.115385	0.115385	0.673077		No
	Rehabilitation treatments. Rest	0.0192308	0.173077	0.115385	0.230769	0.461538		No
	Infiltrations / Blockades. Corticosteroids	0.596154	0.173077	0.211538	0.0192308	0		Yes
	Infiltrations / Blockages. Hyaluronic Acid	0.230769	0.269231	0.403846	0.0576923	0.0384615		No
	Infiltrations / Blockades. Local anesthetic	0.634615	0.115385	0.211538	0.0192308	0.0192308		Yes
	Infiltrations / Blockages. Botulinum toxin	0.153846	0.192308	0.346154	0.0769231	0.230769		No
	Infiltrations / Blockages. Physiological serum	0.211538	0.0961538	0.173077	0.192308	0.326923		No
	Infiltrations / Blockages. Prolotherapy: Dextrose	0.0576923	0.134615	0.0576923	0.134615	0.615385		No
	Infiltrations/Blocks. Blood products (Platelet-Rich Plasma, Conditioned Serums, Cytokine-Rich Autologous Serum (CRS),...)	0.423077	0.326923	0.0961538	0.0384615	0.115385		Yes
	Infiltrations / Blockages. Ozone	0.153846	0.0576923	0.0576923	0.0384615	0.692308		No
	Infiltrations / Blockages. Alcohol	0	0	0.0769231	0.230769	0.692308		No
	Infiltrations / Blockages. Phenol	0	0.0384615	0.134615	0.115385	0.711538		No
	Radiofrequency techniques.Continuous/conventional radiofrequency	0.423077	0.269231	0.0192308	0.0384615	0.25		No
	Radiofrequency techniques. Pulsed radiofrequency	0.461538	0.269231	0.0384615	0.0192308	0.211538		Yes
	Radiofrequency techniques. Pulsed radiofrequency with intracanal approach	0.134615	0.173077	0.0961538	0.115385	0.480769		No
	Radiofrequency techniques. Cooled radiofrequency	0	0.0192308	0.173077	0.115385	0.692308		No
	Electrical neuromodulation techniques. Transcranial neurostimulation	0.0576923	0	0.0961538	0.134615	0.711538		No
	Electrical neuromodulation techniques. Deep cerebral and cortical neurostimulation	0	0	0	0.115385	0.884615		No
	Electrical neuromodulation techniques. Dorsal root ganglion neurostimulation	0.115385	0.134615	0.134615	0.115385	0.5		No
	Electrical neuromodulation techniques. Spinal cord neurostimulation	0.134615	0.134615	0.0769231	0.153846	0.5		No
	Electrical neuromodulation techniques. Peripheral nerve neurostimulation	0.115385	0.0961538	0.173077	0.192308	0.423077		No
	Electrical neuromodulation techniques. Subcutaneous neurostimulation or PENS	0.0769231	0.0192308	0.0769231	0.115385	0.711538		No
	Electrical neuromodulation techniques. Transcutaneous electrical neurostimulation or TENS	0.0961538	0.346154	0.230769	0.153846	0.173077		No
	Percutaneous disc decompression techniques. Laser	0	0.0384615	0.0769231	0.0576923	0.826923		No
	Percutaneous disc decompression techniques. Radiofrequency	0.0576923	0.0961538	0.0384615	0.0961538	0.711538		No
	Percutaneous disc decompression techniques. Ethanol	0	0.0769231	0.0192308	0	0.903846		No
	Percutaneous disc decompression techniques. Coablative radiofrequency	0.0769231	0.0576923	0.0961538	0.0384615	0.730769		No
	Epidurolysis with/without epiduroscopy. Chemical epidurolysis (saline solution)	0.0961538	0.0961538	0.0769231	0.0769231	0.653846		No
	Epidurolysis with/without epiduroscopy. Epidurolysis with balloon or Foley catheter	0	0.0384615	0.0769231	0.0769231	0.807692		No
	Epidurolysis with/without epiduroscopy. Physical epidurolysis (own epiduroscopy probe)	0.0384615	0.115385	0.115385	0.0192308	0.711538		No
	Epidurolysis with/without epiduroscopy. Epidurolysis with radioablation	0.0384615	0.0769231	0.0769231	0.0961538	0.711538		No
	Intraspinal infusion system / Intrathecal pump. Externalized systems	0.0384615	0.0192308	0.0576923	0.0961538	0.788462		No
	Intraspinal infusion system / Intrathecal pump. Partially exteriorized systems	0	0.0192308	0.0769231	0.173077	0.730769		No
	Intraspinal infusion system / Intrathecal pump. Completely exteriorized systems	0.0192308	0	0.0961538	0.134615	0.75		No

## Sheet: H1
		%
	Infiltrations/Blocks. Blood products (Platelet-Rich Plasma, Conditioned Serums, Cytokine-Rich Autologous Serum (CRS),...)	0.846154
	Rehabilitation treatments. Physiotherapy - manual therapy	0.701923
	Infiltrations / Blockades. Corticosteroids	0.668269
	Infiltrations / Blockades. Local anesthetic	0.658654
	Rehabilitation treatments. Shock waves	0.576923
	Radiofrequency techniques. Pulsed radiofrequency	0.576923
	Infiltrations / Blockages. Hyaluronic Acid	0.567308
	Radiofrequency techniques.Continuous/conventional radiofrequency	0.538462
	Rehabilitation treatments. Radiofrequency	0.509615
	Electrical neuromodulation techniques. Transcutaneous electrical neurostimulation or TENS	0.415598
	Rehabilitation treatments. Dry needling	0.336538
	Infiltrations / Blockages. Physiological serum	0.283654
	Infiltrations / Blockages. Botulinum toxin	0.259615
	Rehabilitation treatments. Rest	0.251068
	Rehabilitation treatments. Magnetotherapy	0.240385
	Infiltrations / Blockages. Ozone	0.230769
	Rehabilitation treatments. Cryotherapy	0.163462
	Radiofrequency techniques. Pulsed radiofrequency with intracanal approach	0.163462
	Infiltrations / Blockages. Prolotherapy: Dextrose	0.158654
	Electrical neuromodulation techniques. Spinal cord neurostimulation	0.153846
	Electrical neuromodulation techniques. Peripheral nerve neurostimulation	0.153846
	Electrical neuromodulation techniques. Dorsal root ganglion neurostimulation	0.144231
	Percutaneous disc decompression techniques. Radiofrequency	0.139423
	Epidurolysis with/without epiduroscopy. Chemical epidurolysis (saline solution)	0.105769
	Rehabilitation treatments. Hydrotherapy	0.0865385
	Percutaneous disc decompression techniques. Coablative radiofrequency	0.0769231
	Epidurolysis with/without epiduroscopy. Physical epidurolysis (own epiduroscopy probe)	0.0769231
	Epidurolysis with/without epiduroscopy. Epidurolysis with radioablation	0.0673077
	Rehabilitation treatments. Acupuncture	0.0625
	Electrical neuromodulation techniques. Subcutaneous neurostimulation or PENS	0.0576923
	Percutaneous disc decompression techniques. Ethanol	0.0480769
	Electrical neuromodulation techniques. Transcranial neurostimulation	0.0384615
	Intraspinal infusion system / Intrathecal pump. Externalized systems	0.0288462
	Infiltrations / Blockages. Phenol	0.0192308
	Percutaneous disc decompression techniques. Laser	0.0192308
	Epidurolysis with/without epiduroscopy. Epidurolysis with balloon or Foley catheter	0.0192308
	Intraspinal infusion system / Intrathecal pump. Partially exteriorized systems	0.0192308
	Rehabilitation treatments. Hyperbaric chamber	0.00961538
	Radiofrequency techniques. Cooled radiofrequency	0.00961538
	Intraspinal infusion system / Intrathecal pump. Completely exteriorized systems	0.00961538
	Infiltrations / Blockages. Alcohol	0
	Electrical neuromodulation techniques. Deep cerebral and cortical neurostimulation	0

## Sheet: B0D
			Totals	5	4	3	2	1				Anesthesiology, Resuscitation and Pain Management	5	4	3	2	1				Orthopedic Surgery and Traumatology	5	4	3	2	1				Physical Medicine and Rehabilitation	5	4	3	2	1				Rheumatology	5	4	3	2	1					Weighted average
	Musculoskeletal pain. Lower back pain - low back pain (facet, discogenic, myofascial, etc.)			0.692308	0.134615	0	0	0.173077		Yes		26	0.846154	0.153846	0	0	0		Yes		9	0	0	0	0	1		No		13	0.769231	0.230769	0	0	0		Yes		4	1	0	0	0	0		Yes
	Musculoskeletal pain. Chest pain - back pain			0.0769231	0.326923	0.211538	0.153846	0.230769		No		26	0.0384615	0.461538	0.192308	0.192308	0.115385		No		9	0	0	0	0	1		No		13	0.230769	0.384615	0.230769	0.153846	0		No		4	0	0	0.75	0.25	0		No
	Musculoskeletal pain. Cervical pain - cervicalgia			0.384615	0.307692	0.0961538	0.0384615	0.173077		No		26	0.346154	0.461538	0.115385	0.0769231	0		Yes		9	0	0	0	0	1		No		13	0.692308	0.153846	0.153846	0	0		Yes		4	0.5	0.5	0	0	0		Yes
	Musculoskeletal pain. Musculotendinous, ligamentous and/or peripheral bursal pain			0.576923	0.25	0.173077	0	0		Yes		26	0.346154	0.346154	0.307692	0	0		No		9	1	0	0	0	0		Yes		13	0.692308	0.230769	0.0769231	0	0		Yes		4	0.75	0.25	0	0	0		Yes
	Musculoskeletal pain. Peripheral joint pain: knee, shoulder, elbow, ankle, etc.			0.653846	0.25	0.0576923	0.0384615	0		Yes		26	0.384615	0.423077	0.115385	0.0769231	0		Yes		9	1	0	0	0	0		Yes		13	0.846154	0.153846	0	0	0		Yes		4	1	0	0	0	0		Yes
	Neuropathic pain. Central			0.0769231	0.192308	0.192308	0.0769231	0.461538		No		26	0.0769231	0.230769	0.269231	0.0384615	0.384615		No		9	0	0	0	0	1		No		13	0.153846	0.307692	0.0769231	0.230769	0.230769		No		4	0	0	0.5	0	0.5		No
	Neuropathic pain. Peripheral neuropathy			0.115385	0.423077	0.384615	0.0769231	0		No		26	0.115385	0.269231	0.538462	0.0769231	0		No		9	0	1	0	0	0		Yes		13	0.230769	0.384615	0.307692	0.0769231	0		No		4	0	0.25	0.5	0.25	0		No
	Neuropathic pain. Peripheral polyneuropathy			0	0.0576923	0.403846	0.365385	0.173077		No		26	0	0.0384615	0.576923	0.269231	0.115385		No		9	0	0	0	0.666667	0.333333		No		13	0	0.153846	0.461538	0.307692	0.0769231		No		4	0	0	0	0.5	0.5		No
	Neuropathic pain. Chronic painful polyneuropathy			0	0.0961538	0.307692	0.307692	0.288462		No		26	0	0.115385	0.346154	0.423077	0.115385		No		9	0	0	0	0	1		No		13	0	0.153846	0.461538	0.307692	0.0769231		No		4	0	0	0.25	0.25	0.5		No
	Neuropathic pain. Chronic painful radiculopathy			0.326923	0.423077	0.0576923	0.192308	0		Yes		26	0.461538	0.5	0.0384615	0	0		Yes		9	0	0	0	1	0		No		13	0.384615	0.461538	0.0769231	0.0769231	0		Yes		4	0	0.75	0.25	0	0		Yes
	Neuropathic pain. Complex Regional Pain Syndrome (CRPS) (Primary Chronic Pain according to ICD-11)			0.0192308	0.153846	0.211538	0.307692	0.307692		No		26	0	0.192308	0.307692	0.346154	0.153846		No		9	0	0	0	0	1		No		13	0.0769231	0.230769	0.230769	0.384615	0.0769231		No		4	0	0	0	0.5	0.5		No
	Rehabilitation treatments. Hyperbaric chamber			0	0.0192308	0	0.0576923	0.923077		No		26	0	0.0384615	0	0	0.961538		No		9	0	0	0	0	1		No		13	0	0	0	0.0769231	0.923077		No		4	0	0	0	0.5	0.5		No
	Rehabilitation treatments. Cryotherapy			0.115385	0.0576923	0.0961538	0.153846	0.576923		No		26	0	0.0384615	0.0769231	0.192308	0.692308		No		9	0	0	0	0	1		No		13	0.461538	0.153846	0.153846	0.0769231	0.153846		No		4	0	0	0.25	0.5	0.25		No
	Rehabilitation treatments. Physiotherapy - manual therapy			0.153846	0.365385	0.173077	0.0384615	0.269231		No		26	0.0769231	0.192308	0.153846	0.0769231	0.5		No		9	0	1	0	0	0		Yes		13	0.230769	0.307692	0.384615	0	0.0769231		No		4	0.75	0.25	0	0	0		Yes
	Rehabilitation treatments. Magnetotherapy			0.0961538	0.0769231	0.173077	0.173077	0.480769		No		26	0.0384615	0.0384615	0.192308	0.192308	0.538462		No		9	0	0	0	0	1		No		13	0.153846	0.230769	0.153846	0.307692	0.153846		No		4	0.5	0	0.5	0	0		No
	Rehabilitation treatments. Shock waves			0.0769231	0.346154	0.115385	0.134615	0.326923		No		26	0.0384615	0	0.115385	0.192308	0.653846		No		9	0	1	0	0	0		Yes		13	0.230769	0.538462	0.153846	0.0769231	0		Yes		4	0	0.5	0.25	0.25	0		No
	Rehabilitation treatments. Dry needling			0.0576923	0.211538	0.153846	0.115385	0.461538		No		26	0.0384615	0	0.115385	0.192308	0.653846		No		9	0	1	0	0	0		Yes		13	0.153846	0.153846	0.230769	0.0769231	0.384615		No		4	0	0	0.5	0	0.5		No
	Rehabilitation treatments. Acupuncture			0.0192308	0	0.0769231	0.173077	0.730769		No		26	0	0	0.0769231	0.192308	0.730769		No		9	0	0	0	0	1		No		13	0	0	0.0769231	0.230769	0.692308		No		4	0.25	0	0.25	0.25	0.25		No
	Rehabilitation treatments. Radiofrequency			0.346154	0.269231	0.0576923	0.0576923	0.269231		No		26	0.5	0.269231	0.0384615	0.0769231	0.115385		Yes		9	0	0	0	0	1		No		13	0.384615	0.384615	0.0769231	0.0769231	0.0769231		Yes		4	0	0.5	0.25	0	0.25		No
	Rehabilitation treatments. Hydrotherapy			0.0384615	0.0576923	0.115385	0.115385	0.673077		No		26	0	0.0384615	0.115385	0.0769231	0.769231		No		9	0	0	0	0	1		No		13	0.153846	0.153846	0.230769	0.153846	0.307692		No		4	0	0	0	0.5	0.5		No
	Rehabilitation treatments. Rest			0.0192308	0.173077	0.115385	0.230769	0.461538		No		26	0.0384615	0	0.153846	0.192308	0.615385		No		9	0	0.888889	0	0	0.111111		Yes		13	0	0.0769231	0.153846	0.384615	0.384615		No		4	0	0	0	0.5	0.5		No
	Infiltrations / Blockades. Corticosteroids			0.596154	0.173077	0.211538	0.0192308	0		Yes		26	0.653846	0.269231	0.0769231	0	0		Yes		9	0	0	1	0	0		No		13	0.846154	0.153846	0	0	0		Yes		4	0.75	0	0	0.25	0		Yes
	Infiltrations / Blockages. Hyaluronic Acid			0.230769	0.269231	0.403846	0.0576923	0.0384615		No		26	0.115385	0.307692	0.423077	0.115385	0.0384615		No		9	0	0	1	0	0		No		13	0.461538	0.384615	0.0769231	0	0.0769231		Yes		4	0.75	0.25	0	0	0		Yes
	Infiltrations / Blockades. Local anesthetic			0.634615	0.115385	0.211538	0.0192308	0.0192308		Yes		26	0.730769	0.153846	0.0769231	0.0384615	0		Yes		9	0	0	1	0	0		No		13	0.846154	0.153846	0	0	0		Yes		4	0.75	0	0	0	0.25		Yes
	Infiltrations / Blockages. Botulinum toxin			0.153846	0.192308	0.346154	0.0769231	0.230769		No		26	0.230769	0.115385	0.576923	0.0769231	0		No		9	0	0	0	0	1		No		13	0.153846	0.538462	0.230769	0.0769231	0		No		4	0	0	0	0.25	0.75		No
	Infiltrations / Blockages. Physiological serum			0.211538	0.0961538	0.173077	0.192308	0.326923		No		26	0.230769	0.0384615	0.115385	0.153846	0.461538		No		9	0	0	0.555556	0.444444	0		No		13	0.307692	0.307692	0.0769231	0.0769231	0.230769		No		4	0.25	0	0	0.25	0.5		No
	Infiltrations / Blockages. Prolotherapy: Dextrose			0.0576923	0.134615	0.0576923	0.134615	0.615385		No		26	0.115385	0.192308	0.0769231	0.0769231	0.538462		No		9	0	0	0	0	1		No		13	0	0.0769231	0.0769231	0.230769	0.615385		No		4	0	0.25	0	0.5	0.25		No
	Infiltrations/Blocks. Blood products (Platelet-Rich Plasma, Conditioned Serums, Cytokine-Rich Autologous Serum (CRS),...)			0.423077	0.326923	0.0961538	0.0384615	0.115385		Yes		26	0.269231	0.346154	0.153846	0.0384615	0.192308		No		9	1	0	0	0	0		Yes		13	0.230769	0.538462	0.0769231	0.0769231	0.0769231		Yes		4	0.75	0.25	0	0	0		Yes
	Infiltrations / Blockages. Ozone			0.153846	0.0576923	0.0576923	0.0384615	0.692308		No		26	0.192308	0.0769231	0.115385	0.0384615	0.576923		No		9	0	0	0	0	1		No		13	0.0769231	0.0769231	0	0.0769231	0.769231		No		4	0.5	0	0	0	0.5		No
	Infiltrations / Blockages. Alcohol			0	0	0.0769231	0.230769	0.692308		No		26	0	0	0.153846	0.423077	0.423077		No		9	0	0	0	0	1		No		13	0	0	0	0.0769231	0.923077		No		4	0	0	0	0	1		No
	Infiltrations / Blockages. Phenol			0	0.0384615	0.134615	0.115385	0.711538		No		26	0	0.0769231	0.230769	0.230769	0.461538		No		9	0	0	0	0	1		No		13	0	0	0.0769231	0	0.923077		No		4	0	0	0	0	1		No
	Radiofrequency techniques.Continuous/conventional radiofrequency			0.423077	0.269231	0.0192308	0.0384615	0.25		No		26	0.653846	0.307692	0	0.0384615	0		Yes		9	0	0	0	0	1		No		13	0.384615	0.307692	0	0.0769231	0.230769		No		4	0	0.5	0.25	0	0.25		No
	Radiofrequency techniques. Pulsed radiofrequency			0.461538	0.269231	0.0384615	0.0192308	0.211538		Yes		26	0.653846	0.307692	0	0.0384615	0		Yes		9	0	0	0	0	1		No		13	0.461538	0.384615	0.153846	0	0		Yes		4	0.25	0.25	0	0	0.5		No
	Radiofrequency techniques. Pulsed radiofrequency with intracanal approach			0.134615	0.173077	0.0961538	0.115385	0.480769		No		26	0.269231	0.307692	0.153846	0.192308	0.0769231		No		9	0	0	0	0	1		No		13	0	0.0769231	0.0769231	0.0769231	0.769231		No		4	0	0	0	0	1		No
	Radiofrequency techniques. Cooled radiofrequency			0	0.0192308	0.173077	0.115385	0.692308		No		26	0	0.0384615	0.269231	0.192308	0.5		No		9	0	0	0	0	1		No		13	0	0	0.153846	0.0769231	0.769231		No		4	0	0	0	0	1		No
	Electrical neuromodulation techniques. Transcranial neurostimulation			0.0576923	0	0.0961538	0.134615	0.711538		No		26	0.0769231	0	0.0769231	0.230769	0.615385		No		9	0	0	0	0	1		No		13	0.0769231	0	0.153846	0.0769231	0.692308		No		4	0	0	0.25	0	0.75		No
	Electrical neuromodulation techniques. Deep cerebral and cortical neurostimulation			0	0	0	0.115385	0.884615		No		26	0	0	0	0.153846	0.846154		No		9	0	0	0	0	1		No		13	0	0	0	0.0769231	0.923077		No		4	0	0	0	0.25	0.75		No
	Electrical neuromodulation techniques. Dorsal root ganglion neurostimulation			0.115385	0.134615	0.134615	0.115385	0.5		No		26	0.192308	0.230769	0.230769	0.153846	0.192308		No		9	0	0	0	0	1		No		13	0.0769231	0.0769231	0.0769231	0.0769231	0.692308		No		4	0	0	0	0.25	0.75		No
	Electrical neuromodulation techniques. Spinal cord neurostimulation			0.134615	0.134615	0.0769231	0.153846	0.5		No		26	0.230769	0.230769	0.153846	0.230769	0.153846		No		9	0	0	0	0	1		No		13	0.0769231	0.0769231	0	0.0769231	0.769231		No		4	0	0	0	0.25	0.75		No
	Electrical neuromodulation techniques. Peripheral nerve neurostimulation			0.115385	0.0961538	0.173077	0.192308	0.423077		No		26	0.115385	0.115385	0.269231	0.307692	0.192308		No		9	0	0	0	0	1		No		13	0.230769	0.153846	0.0769231	0.0769231	0.461538		No		4	0	0	0.25	0.25	0.5		No
	Electrical neuromodulation techniques. Subcutaneous neurostimulation or PENS			0.0769231	0.0192308	0.0769231	0.115385	0.711538		No		26	0.115385	0.0384615	0.153846	0.192308	0.5		No		9	0	0	0	0	1		No		13	0.0769231	0	0	0.0769231	0.846154		No		4	0	0	0	0	1		No
	Electrical neuromodulation techniques. Transcutaneous electrical neurostimulation or TENS			0.0961538	0.346154	0.230769	0.153846	0.173077		No		26	0.0769231	0.269231	0.269231	0.230769	0.153846		No		9	0	0.777778	0	0	0.222222		Yes		13	0.230769	0.307692	0.230769	0.0769231	0.153846		No		4	0	0	0.5	0.25	0.25		No
	Percutaneous disc decompression techniques. Laser			0	0.0384615	0.0769231	0.0576923	0.826923		No		26	0	0.0769231	0.0384615	0.0384615	0.846154		No		9	0	0	0	0	1		No		13	0	0	0.153846	0.0769231	0.769231		No		4	0	0	0.25	0.25	0.5		No
	Percutaneous disc decompression techniques. Radiofrequency			0.0576923	0.0961538	0.0384615	0.0961538	0.711538		No		26	0.0769231	0.153846	0.0769231	0.153846	0.538462		No		9	0	0	0	0	1		No		13	0.0769231	0	0	0.0769231	0.846154		No		4	0	0.25	0	0	0.75		No
	Percutaneous disc decompression techniques. Ethanol			0	0.0769231	0.0192308	0	0.903846		No		26	0	0.115385	0.0384615	0	0.846154		No		9	0	0	0	0	1		No		13	0	0.0769231	0	0	0.923077		No		4	0	0	0	0	1		No
	Percutaneous disc decompression techniques. Coablative radiofrequency			0.0769231	0.0576923	0.0961538	0.0384615	0.730769		No		26	0.115385	0.115385	0.115385	0.0384615	0.615385		No		9	0	0	0	0	1		No		13	0.0769231	0	0.0769231	0.0769231	0.769231		No		4	0	0	0.25	0	0.75		No
	Epidurolysis with/without epiduroscopy. Chemical epidurolysis (saline solution)			0.0961538	0.0961538	0.0769231	0.0769231	0.653846		No		26	0.192308	0.153846	0.153846	0.115385	0.384615		No		9	0	0	0	0	1		No		13	0	0.0769231	0	0.0769231	0.846154		No		4	0	0	0	0	1		No
	Epidurolysis with/without epiduroscopy. Epidurolysis with balloon or Foley catheter			0	0.0384615	0.0769231	0.0769231	0.807692		No		26	0	0.0769231	0.153846	0.0769231	0.692308		No		9	0	0	0	0	1		No		13	0	0	0	0.153846	0.846154		No		4	0	0	0	0	1		No
	Epidurolysis with/without epiduroscopy. Physical epidurolysis (own epiduroscopy probe)			0.0384615	0.115385	0.115385	0.0192308	0.711538		No		26	0.0769231	0.230769	0.192308	0	0.5		No		9	0	0	0	0	1		No		13	0	0	0.0769231	0.0769231	0.846154		No		4	0	0	0	0	1		No
	Epidurolysis with/without epiduroscopy. Epidurolysis with radioablation			0.0384615	0.0769231	0.0769231	0.0961538	0.711538		No		26	0.0769231	0.115385	0.153846	0.115385	0.538462		No		9	0	0	0	0	1		No		13	0	0.0769231	0	0.153846	0.769231		No		4	0	0	0	0	1		No
	Intraspinal infusion system / Intrathecal pump. Externalized systems			0.0384615	0.0192308	0.0576923	0.0961538	0.788462		No		26	0.0769231	0.0384615	0.0769231	0.192308	0.615385		No		9	0	0	0	0	1		No		13	0	0	0.0769231	0	0.923077		No		4	0	0	0	0	1		No
	Intraspinal infusion system / Intrathecal pump. Partially exteriorized systems			0	0.0192308	0.0769231	0.173077	0.730769		No		26	0	0	0.153846	0.269231	0.576923		No		9	0	0	0	0	1		No		13	0	0.0769231	0	0.153846	0.769231		No		4	0	0	0	0	1		No
	Intraspinal infusion system / Intrathecal pump. Completely exteriorized systems			0.0192308	0	0.0961538	0.134615	0.75		No		26	0.0384615	0	0.115385	0.230769	0.615385		No		9	0	0	0	0	1		No		13	0	0	0.153846	0.0769231	0.769231		No		4	0	0	0	0	1		No
[truncated: 6 more columns]

## Sheet: B1+2
	BLOCK 1+2: Patient information + Pathology and final prescription
	Totals	48
	Anesthesiology, Resuscitation and Pain Management	26
	Orthopedic Surgery and Traumatology	9
	Physical Medicine and Rehabilitation	10
	Rheumatology	3
	Weighted average	48
	Totals	← Choose the results to display
		5	4	3	2	1
	General. Medical Record Number	0.918367	0	0.0408163	0	0.0408163		Yes
	General.Gender	0.734694	0.122449	0.142857	0	0		Yes
	General.Age / Date of birth	0.857143	0.0816327	0.0612245	0	0		Yes
	General.Weight	0.367347	0.387755	0.122449	0.0816327	0.0408163		Yes
	General.Height	0.0833333	0.138889	0.527778	0.166667	0.0833333		Without consensus
	General. Body Mass Index	0.510204	0.285714	0.142857	0.0408163	0.0204082		Yes
	General.% body fat	0.0277778	0.166667	0.555556	0.138889	0.111111		Without consensus
	Allergies / Intolerances. Food allergies	0.611111	0.0277778	0.166667	0.138889	0.0555556		Without consensus
	Allergies / Intolerances. Drug allergies	0.959184	0	0.0204082	0.0204082	0		Yes
	Allergies / Intolerances. Medication intolerances	0.836735	0.0816327	0.0408163	0.0408163	0		Yes
	Medical history. Medical history (previous pathologies)	0.918367	0.0816327	0	0	0		Yes
	Medical history. Psychiatric history (e.g., depression, anxiety, etc.)	0.877551	0.0612245	0.0612245	0	0		Yes
	Medical history.(*) Surgical history	0.8125	0.125	0.0625	0	0		Yes
	Medical history.(*) Previous psychological therapy	0.625	0.1875	0.145833	0.0416667	0		Yes
	Current medication. For pain treatment	0.938776	0.0612245	0	0	0		Yes
	Current medication. Psychiatric	0.836735	0.142857	0.0204082	0	0		Yes
	Current medication. Anticoagulant/antiplatelet agent	0.897959	0.0816327	0	0	0.0204082		Yes
	Current Medication.General / Other	0.44898	0.326531	0.183673	0.0204082	0.0204082		Yes
	Toxic habits. Tobacco use: Yes / No / Ex-smoker	0.388889	0.194444	0.305556	0.0555556	0.0555556		Without consensus
	Toxic habits. Tobacco use: Cumulative dose / Frequency of use	0.194444	0.138889	0.388889	0.138889	0.138889		Without consensus
	Toxic habits. Alcohol: Yes / No / Ex-alcoholic	0.444444	0.25	0.194444	0.0833333	0.0277778		Without consensus
	Toxic habits. Alcohol: UBE / Frequency of consumption	0.194444	0.25	0.25	0.138889	0.166667		Without consensus
	Toxic habits. Illicit drugs: Yes / No / Ex-consumer	0.8125	0	0.166667	0.0208333	0		Yes
	Toxic habits. Illicit drugs: Frequency of use	0.444444	0.138889	0.194444	0.111111	0.111111		Without consensus
	Toxic habits. Illicit drugs: Types (§ cannabis, opiates/opioids, cocaine, methamphetamines, hallucinogens, central nervous system depressants, ayahuasca, etc.)	0.75	0	0.1875	0.0625	0		Yes
	Toxic habits. History of drug abuse	0.795918	0	0.163265	0.0408163	0		Yes
	Toxic habits. Family history of substance abuse	0.194444	0.111111	0.333333	0.138889	0.222222		Without consensus
	Toxic habits. Childhood sexual abuse	0.25	0.25	0.25	0.0555556	0.194444		Without consensus
	Environmental factors. Sleep disorders	0.591837	0.22449	0.122449	0.0408163	0.0204082		Yes
	Environmental factors. Daily sleep hours	0.194444	0.305556	0.305556	0.166667	0.0277778		Without consensus
	Environmental factors. Degree of perceived stress	0.361111	0.25	0.25	0.0555556	0.0833333		Without consensus
	Occupation and personal situation. Type of work: Structured by intensity (e.g., system of collars)	0.653061	0.22449	0.122449	0	0		Yes
	Occupation and personal situation. Current employment status (Active, Sick leave, Disability, Retired, Unemployed, Inactive)	0.693878	0.244898	0.0612245	0	0		Yes
	Occupation and personal situation. Litigation associated with work-related activity?	0.612245	0.204082	0.142857	0.0408163	0		Yes
	Occupation and personal situation. Marital status	0.222222	0.111111	0.333333	0.222222	0.111111		Without consensus
	Occupation and personal situation.Level of education	0.111111	0.277778	0.361111	0.111111	0.138889		Without consensus
	Occupation and personal situation. Financial situation	0.0555556	0.222222	0.388889	0.222222	0.111111		Without consensus
	Occupation and personal situation. Sport: Type	0.387755	0.387755	0.163265	0.0612245	0		Yes
	Occupation and personal situation. Sport: Intensity	0.387755	0.367347	0.163265	0.0612245	0.0204082		Yes
	Occupation and personal situation. Sport: Maximum oxygen consumption (VO2 max)	0.111111	0.166667	0.222222	0.305556	0.194444		Without consensus
	Occupation and personal situation.(*) Family support	0.270833	0.583333	0.0833333	0.0416667	0.0208333		Yes
	Occupation and personal situation.(*) Ability to use apps and new technologies	0.0833333	0.138889	0.5	0.194444	0.0833333		Without consensus
	Details of the pathology.Diagnostic pathology	0.938776	0.0612245	0	0	0		Yes
	Details of the pathology.Location	0.918367	0.0612245	0.0204082	0	0		Yes
	Details of the pathology. Laterality	0.836735	0.0612245	0.0816327	0	0		Yes
	Details of the pathology. Severity of the injury – (radiological classification if applicable)	0.714286	0.22449	0.0408163	0.0204082	0		Yes
	Details of the pathology. Duration	0.816327	0.142857	0.0408163	0	0		Yes
	Details of the pathology. Continuous or intermittent	0.77551	0.163265	0.0408163	0	0		Yes
	Details of the pathology. Factors that provoke pain/Factors that improve pain	0.877551	0.122449	0	0	0		Yes
	Details of the pathology. Respect for night rest	0.795918	0.204082	0	0	0		Yes
	Details of the pathology. Previous treatments	0.77551	0.204082	0	0	0		Yes
	Details of the pathology.(*) Specialty that refers you	0.333333	0.277778	0.166667	0.138889	0.0833333		Without consensus
	Details of the pathology.(*) Response to previous treatments	0.770833	0.166667	0.0625	0	0		Yes
	Details of the pathology.(*) Environmental triggering factors	0.222222	0.277778	0.166667	0.25	0.0833333		Without consensus
	Details of the pathology.(*) Functional impact of the pathology	0.729167	0.1875	0.0625	0.0208333	0		Yes
	Prescription details (prescription is understood as the main technique/intervention to be performed). Main treatment	0.959184	0.0408163	0	0	0		Yes
	Prescription details (prescription is understood as the main technique/intervention to be performed). Other associated treatments	0.734694	0.183673	0.0816327	0	0		Yes
	Prescription details (prescription is understood as the main technique/intervention to be performed). Prescription start date	0.693878	0.22449	0.0816327	0	0		Yes
	Prescription details (prescription is understood as the main technique/intervention to be performed). Number of sessions	0.571429	0.285714	0.122449	0.0204082	0		Yes
	Prescription details (prescription is understood as the main technique/intervention to be performed). Treatment frequency	0.612245	0.244898	0.122449	0	0		Yes

## Sheet: B1+2D
			TOTALS	5	4	3	2	1				Anesthesiology, Resuscitation and Pain Management	5	4	3	2	1				Orthopedic Surgery and Traumatology	5	4	3	2	1				Physical Medicine and Rehabilitation	5	4	3	2	1				Rheumatology	5	4	3	2	1				Weighted average	5
	General. Medical Record Number			0.918367	0	0.0408163	0	0.0408163	0	Yes		26	1	0	0	0	0		Yes		9	0.666667	0	0.111111	0	0.222222		Without consensus		10	0.9	0	0.1	0	0		Yes		3	1	0	0	0	0		Yes		0	0.891667
	General.Gender			0.734694	0.122449	0.142857	0	0	0	Yes		0	0.807692	0.115385	0.0769231	0	0		Yes		0	0.444444	0.111111	0.444444	0	0		Without consensus		0	0.7	0.2	0.1	0	0		Yes		0	1	0	0	0	0		Yes		0	0.738034
	General.Age / Date of birth			0.857143	0.0816327	0.0612245	0	0	0	Yes		0	0.923077	0.0384615	0.0384615	0	0		Yes		0	0.888889	0.111111	0	0	0		Yes		0	0.7	0.1	0.2	0	0		Yes		0	0.666667	0.333333	0	0	0		Yes		0	0.794658
	General.Weight			0.367347	0.387755	0.122449	0.0816327	0.0408163	0	Yes		0	0.384615	0.307692	0.192308	0.0769231	0.0384615		Without consensus		0	0.444444	0.333333	0.111111	0	0.111111		Yes		0	0.2	0.7	0	0.1	0		Yes		0	0.333333	0.333333	0	0.333333	0		Without consensus		0	0.340598
	General.Height			0.0833333	0.138889	0.527778	0.166667	0.0833333	0	Without consensus		0	0.105263	0.157895	0.526316	0.157895	0.0526316		Without consensus		0	0.222222	0.333333	0.25	0.333333	0.333333		Without consensus		0	0.0909091	0.0909091	0.636364	0.181818	0.1		Without consensus		0	0.1	0.4	0.666667	0.1	0.333333		Without consensus		0	0.0490431
	General. Body Mass Index			0.510204	0.285714	0.142857	0.0408163	0.0204082	0	Yes		0	0.653846	0.192308	0.115385	0.0384615	0		Yes		0	0.555556	0.333333	0	0	0.111111		Yes		0	0.2	0.6	0.2	0	0		Yes		0	0	0	0.666667	0.333333	0		Without consensus		0	0.35235
	General.% body fat			0.0277778	0.166667	0.555556	0.138889	0.111111	0	Without consensus		0	0.0526316	0.157895	0.473684	0.157895	0.157895		Without consensus		0	0.125	0.25	0.666667	0.333333	0.222222		Without consensus		0	0.2	0.272727	0.636364	0.0909091	0		Without consensus		0	0.2	0.2	0.666667	0.1	0.333333		Without consensus		0	0.0131579
	Allergies / Intolerances. Food allergies			0.611111	0.0277778	0.166667	0.138889	0.0555556	0	Without consensus		0	0.631579	0.0526316	0.157895	0.157895	0.037037		Without consensus		0	0.666667	0.125	0.333333	0.125	0.125		Without consensus		0	0.454545	0.1	0.181818	0.181818	0.181818		Without consensus		0	1	0	0.1	0.2	0.1		Yes		0	0.688198
	Allergies / Intolerances. Drug allergies			0.959184	0	0.0204082	0.0204082	0	0	Yes		0	0.961538	0	0.0384615	0	0		Yes		0	0.888889	0	0	0.111111	0		Yes		0	1	0	0	0	0		Yes		0	1	0	0	0	0		Yes		0	0.962607
	Allergies / Intolerances. Medication intolerances			0.836735	0.0816327	0.0408163	0.0408163	0	0	Yes		0	0.807692	0.0769231	0.0769231	0.0384615	0		Yes		0	0.777778	0.111111	0	0.111111	0		Yes		0	0.9	0.1	0	0	0		Yes		0	1	0	0	0	0		Yes		0	0.871368
	Medical history. Medical history (previous pathologies)			0.918367	0.0816327	0	0	0	0	Yes		0	0.961538	0.0384615	0	0	0		Yes		0	0.888889	0.111111	0	0	0		Yes		0	0.8	0.2	0	0	0		Yes		0	1	0	0	0	0		Yes		0	0.912607
	Medical history. Psychiatric history (e.g., depression, anxiety, etc.)			0.877551	0.0612245	0.0612245	0	0	0	Yes		0	0.923077	0.0384615	0.0384615	0	0		Yes		0	0.666667	0.111111	0.222222	0	0		Yes		0	0.9	0.1	0	0	0		Yes		0	1	0	0	0	0		Yes		0	0.872436
	Medical history.(*) Surgical history			0.8125	0.125	0.0625	0	0	0	Yes		0	0.814815	0.148148	0.037037	0	0		Yes		0	0.75	0	0.25	0	0		Yes		0	0.8	0.2	0	0	0		Yes		0	0.8	0.2	0	0	0		Yes		0	0.791204
	Medical history.(*) Previous psychological therapy			0.625	0.1875	0.145833	0.0416667	0	0	Yes		0	0.703704	0.148148	0.148148	0	0		Yes		0	0.625	0	0.375	0	0		Without consensus		0	0.5	0.4	0	0.1	0		Yes		0	0.5	0.4	0	0.1	0		Yes		0	0.582176
	Current medication. For pain treatment			0.938776	0.0612245	0	0	0	0	Yes		0	1	0	0	0	0		Yes		0	0.777778	0.222222	0	0	0		Yes		0	0.9	0.1	0	0	0		Yes		0	1	0	0	0	0		Yes		0	0.919444
	Current medication. Psychiatric			0.836735	0.142857	0.0204082	0	0	0	Yes		0	0.923077	0.0384615	0.0384615	0	0		Yes		0	0.555556	0.444444	0	0	0		Yes		0	0.8	0.2	0	0	0		Yes		0	1	0	0	0	0		Yes		0	0.819658
	Current medication. Anticoagulant/antiplatelet agent			0.897959	0.0816327	0	0	0.0204082	0	Yes		0	0.961538	0.0384615	0	0	0		Yes		0	0.777778	0.111111	0	0	0.111111		Yes		0	0.8	0.2	0	0	0		Yes		0	1	0	0	0	0		Yes		0	0.884829
	Current Medication.General / Other			0.44898	0.326531	0.183673	0.0204082	0.0204082	0	Yes		0	0.5	0.346154	0.115385	0	0.0384615		Yes		0	0.444444	0.111111	0.333333	0.111111	0		Without consensus		0	0.2	0.5	0.3	0	0		Yes		0	0.666667	0.333333	0	0	0		Yes		0	0.452778
	Toxic habits. Tobacco use: Yes / No / Ex-smoker			0.388889	0.194444	0.305556	0.0555556	0.0555556	0	Without consensus		0	0.368421	0.263158	0.315789	0.0526316	0		Without consensus		0	0.333333	0	0.5	0.333333	0.333333		Without consensus		0	0.363636	0.0909091	0.454545	0	0.0909091		Without consensus		0	0.666667	0.333333	0.5	0	0		Yes		0	0.433014
	Toxic habits. Tobacco use: Cumulative dose / Frequency of use			0.194444	0.138889	0.388889	0.138889	0.138889	0	Without consensus		0	0.315789	0.210526	0.263158	0.157895	0.0526316		Without consensus		0	0.25	0	0.333333	0.125	0.666667		Without consensus		0	0.0909091	0.0909091	0.636364	0.0909091	0.0909091		Without consensus		0	0.4	0	0.333333	0.333333	0.333333		Without consensus		0	0.101675
	Toxic habits. Alcohol: Yes / No / Ex-alcoholic			0.444444	0.25	0.194444	0.0833333	0.0277778	0	Without consensus		0	0.421053	0.315789	0.210526	0.0526316	0		Yes		0	0.25	0.333333	0.333333	0.25	0.333333		Without consensus		0	0.454545	0.181818	0.181818	0.181818	0		Without consensus		0	1	0	0.1	0	0		Yes		0	0.4689
	Toxic habits. Alcohol: UBE / Frequency of consumption			0.194444	0.25	0.25	0.138889	0.166667	0	Without consensus		0	0.263158	0.368421	0.210526	0.105263	0.0526316		Without consensus		0	0.25	0	0.333333	0.25	0.666667		Without consensus		0	0.0909091	0.181818	0.363636	0.181818	0.181818		Without consensus		0	0.333333	0	0.4	0.333333	0.333333		Without consensus		0	0.17185
	Toxic habits. Illicit drugs: Yes / No / Ex-consumer			0.8125	0	0.166667	0.0208333	0	0	Yes		0	0.851852	0	0.148148	0	0		Yes		0	0.625	0	0.25	0.125	0		Without consensus		0	0.9	0	0.1	0	0		Yes		0	0.9	0	0.1	0	0		Yes		0	0.819213
	Toxic habits. Illicit drugs: Frequency of use			0.444444	0.138889	0.194444	0.111111	0.111111	0	Without consensus		0	0.473684	0.105263	0.315789	0.0526316	0.0526316		Without consensus		0	0.5	0.333333	0.375	0.333333	0.333333		Without consensus		0	0.454545	0.181818	0.0909091	0.0909091	0.181818		Without consensus		0	0.666667	0	0.2	0.333333	0		Without consensus		0	0.398724
	Toxic habits. Illicit drugs: Types (§ cannabis, opiates/opioids, cocaine, methamphetamines, hallucinogens, central nervous system depressants, ayahuasca, etc.)			0.75	0	0.1875	0.0625	0	0	Yes		0	0.814815	0	0.111111	0.0740741	0		Yes		0	0.5	0	0.375	0.125	0		Without consensus		0	0.9	0	0.1	0	0		Yes		0	0.9	0	0.1	0	0		Yes		0	0.778704
	Toxic habits. History of drug abuse			0.795918	0	0.163265	0.0408163	0	0	Yes		0	0.846154	0	0.153846	0	0		Yes		0	0.666667	0	0.222222	0.111111	0		Without consensus		0	0.9	0	0	0.1	0		Yes		0	0.333333	0	0.666667	0	0		Without consensus		0	0.686538
	Toxic habits. Family history of substance abuse			0.194444	0.111111	0.333333	0.138889	0.222222	0	Without consensus		0	0.315789	0.157895	0.263158	0.210526	0.0526316		Without consensus		0	0.125	0	0.25	0.25	1		No		0	0.0909091	0.0909091	0.545455	0.0909091	0.181818		Without consensus		0	0.2	0	0.333333	0.2	0.666667		Without consensus		0	0.101675
	Toxic habits. Childhood sexual abuse			0.25	0.25	0.25	0.0555556	0.194444	0	Without consensus		0	0.421053	0.263158	0.263158	0.037037	0.0526316		Without consensus		0	0.125	0	0.25	0.375	1		No		0	0.0909091	0.363636	0.272727	0.181818	0.0909091		Without consensus		0	0.3	0	0.333333	0.1	0.666667		Without consensus		0	0.12799
	Environmental factors. Sleep disorders			0.591837	0.22449	0.122449	0.0408163	0.0204082	0	Yes		0	0.769231	0.153846	0.0769231	0	0		Yes		0	0.222222	0.222222	0.222222	0.222222	0.111111		Without consensus		0	0.5	0.4	0.1	0	0		Yes		0	0.333333	0.333333	0.333333	0	0		Without consensus		0	0.456197
	Environmental factors. Daily sleep hours			0.194444	0.305556	0.305556	0.166667	0.0277778	0	Without consensus		0	0.263158	0.315789	0.263158	0.105263	0.0526316		Without consensus		0	0.125	0.375	0.333333	0.666667	0.222222		Without consensus		0	0.181818	0.363636	0.363636	0.0909091	0		Without consensus		0	0.3	0.333333	0.333333	0.333333	0		Without consensus		0	0.111244
	Environmental factors. Degree of perceived stress			0.361111	0.25	0.25	0.0555556	0.0833333	0	Without consensus		0	0.368421	0.210526	0.263158	0.0526316	0.105263		Without consensus		0	0.25	0.5	0.666667	0.25	0.333333		Without consensus		0	0.454545	0.272727	0.181818	0.0909091	0		Yes		0	0.333333	0.666667	0.1	0	0		Yes		0	0.289075
	Occupation and personal situation. Type of work: Structured by intensity (e.g., system of collars)			0.653061	0.22449	0.122449	0	0	0	Yes		0	0.653846	0.192308	0.153846	0	0		Yes		0	0.666667	0.222222	0.111111	0	0		Yes		0	0.7	0.3	0	0	0		Yes		0	0.333333	0.333333	0.333333	0	0		Without consensus		0	0.588462
	Occupation and personal situation. Current employment status (Active, Sick leave, Disability, Retired, Unemployed, Inactive)			0.693878	0.244898	0.0612245	0	0	0	Yes		0	0.692308	0.269231	0.0384615	0	0		Yes		0	0.777778	0.111111	0.111111	0	0		Yes		0	0.8	0.2	0	0	0		Yes		0	0	0.666667	0.333333	0	0		Without consensus		0	0.567521
	Occupation and personal situation. Litigation associated with work-related activity?			0.612245	0.204082	0.142857	0.0408163	0	0	Yes		0	0.692308	0.192308	0.115385	0	0		Yes		0	0.333333	0.222222	0.333333	0.111111	0		Without consensus		0	0.7	0.2	0.1	0	0		Yes		0	0.333333	0.333333	0	0.333333	0		Without consensus		0	0.514744
	Occupation and personal situation. Marital status			0.222222	0.111111	0.333333	0.222222	0.111111	0	Without consensus		0	0.263158	0.157895	0.315789	0.210526	0.0526316		Without consensus		0	0	0.111111	0.333333	0.333333	0.333333		Without consensus		0	0.272727	0.2	0.363636	0.272727	0.0909091		Without consensus		0	0.2	0.333333	0.333333	0.1	0.333333		Without consensus		0	0.133971
	Occupation and personal situation.Level of education			0.111111	0.277778	0.361111	0.111111	0.138889	0	Without consensus		0	0.210526	0.210526	0.368421	0.157895	0.0526316		Without consensus		0	0.111111	0	0.333333	0.375	0.666667		Without consensus		0	0.1	0.454545	0.363636	0.0909091	0.0909091		Without consensus		0	0.1	0.333333	0.333333	0.1	0.333333		Without consensus		0	0.0526316
	Occupation and personal situation. Financial situation			0.0555556	0.222222	0.388889	0.222222	0.111111	0	Without consensus		0	0.105263	0.210526	0.421053	0.263158	0.148148		Without consensus		0	0.125	0.25	0.333333	0.333333	0.666667		No		0	0.2	0.363636	0.363636	0.181818	0.0909091		Without consensus		0	0.2	0.2	0.666667	0.1	0.333333		Without consensus		0	0.0263158
	Occupation and personal situation. Sport: Type			0.387755	0.387755	0.163265	0.0612245	0	0	Yes		0	0.307692	0.5	0.153846	0.0384615	0		Yes		0	0.222222	0.444444	0.111111	0.222222	0		Without consensus		0	0.7	0.2	0.1	0	0		Yes		0	0.333333	0	0.666667	0	0		Without consensus		0	0.390812
	Occupation and personal situation. Sport: Intensity			0.387755	0.367347	0.163265	0.0612245	0.0204082	0	Yes		0	0.307692	0.461538	0.153846	0.0769231	0		Yes		0	0.222222	0.444444	0.111111	0.111111	0.111111		Without consensus		0	0.7	0.2	0.1	0	0		Yes		0	0.333333	0	0.666667	0	0		Without consensus		0	0.390812
	Occupation and personal situation. Sport: Maximum oxygen consumption (VO2 max)			0.111111	0.166667	0.222222	0.305556	0.194444	0	Without consensus		0	0.0526316	0.315789	0.105263	0.368421	0.157895		Without consensus		0	0	0.125	0.333333	0.333333	0.333333		Without consensus		0	0.181818	0.1	0.363636	0.272727	0.181818		Without consensus		0	0.333333	0.1	0.333333	0.333333	0.333333		Without consensus		0	0.141946
	Occupation and personal situation.(*) Family support			0.270833	0.583333	0.0833333	0.0416667	0.0208333	0	Yes		0	0.333333	0.481481	0.111111	0.0740741	0		Yes		0	0.125	0.875	0	0	0		Yes		0	0.3	0.6	0.1	0	0		Yes		0	0.3	0.6	0.1	0	0		Yes		0	0.264583
	Occupation and personal situation.(*) Ability to use apps and new technologies			0.0833333	0.138889	0.5	0.194444	0.0833333	0	Without consensus		0	0.105263	0.105263	0.526316	0.210526	0.0526316		Without consensus		0	0.125	0.125	0.125	0.666667	0.333333		No		0	0.0909091	0.181818	0.636364	0.0909091	0		Without consensus		0	0.1	0.333333	0.333333	0	0.333333		Without consensus		0	0.0490431
				0	0	0	0	0	0	0		0	0	0	0	0	0		0		0	0	0	0	0	0		0		0	0	0	0	0	0		0		0	0	0	0	0	0		0		0	0
	Details of the pathology.Diagnostic pathology			0.938776	0.0612245	0	0	0	0	Yes		0	0.923077	0.0769231	0	0	0		Yes		0	1	0	0	0	0		Yes		0	0.9	0.1	0	0	0		Yes		0	1	0	0	0	0		Yes		0	0.955769
	Details of the pathology.Location			0.918367	0.0612245	0.0204082	0	0	0	Yes		0	0.884615	0.0769231	0.0384615	0	0		Yes		0	1	0	0	0	0		Yes		0	0.9	0.1	0	0	0		Yes		0	1	0	0	0	0		Yes		0	0.946154
	Details of the pathology. Laterality			0.836735	0.0612245	0.0816327	0	0	0	Yes		0	0.846154	0.0769231	0.0384615	0	0		Yes		0	0.777778	0	0.222222	0	0		Yes		0	0.8	0.1	0.1	0	0		Yes		0	1	0	0	0	0		Yes		0	0.855983
	Details of the pathology. Severity of the injury – (radiological classification if applicable)			0.714286	0.22449	0.0408163	0.0204082	0	0	Yes		0	0.730769	0.230769	0	0.0384615	0		Yes		0	0.777778	0.222222	0	0	0		Yes		0	0.6	0.2	0.2	0	0		Yes		0	0.666667	0.333333	0	0	0		Yes		0	0.693803
	Details of the pathology. Duration			0.816327	0.142857	0.0408163	0	0	0	Yes		0	0.846154	0.115385	0.0384615	0	0		Yes		0	0.666667	0.333333	0	0	0		Yes		0	0.8	0.1	0.1	0	0		Yes		0	1	0	0	0	0		Yes		0	0.828205
	Details of the pathology. Continuous or intermittent			0.77551	0.163265	0.0408163	0	0	0	Yes		0	0.807692	0.115385	0.0384615	0	0		Yes		0	0.666667	0.333333	0	0	0		Yes		0	0.8	0.1	0.1	0	0		Yes		0	0.666667	0.333333	0	0	0		Yes		0	0.735256
	Details of the pathology. Factors that provoke pain/Factors that improve pain			0.877551	0.122449	0	0	0	0	Yes		0	0.961538	0.0384615	0	0	0		Yes		0	0.777778	0.222222	0	0	0		Yes		0	0.8	0.2	0	0	0		Yes		0	0.666667	0.333333	0	0	0		Yes		0	0.801496
	Details of the pathology. Respect for night rest			0.795918	0.204082	0	0	0	0	Yes		0	0.884615	0.115385	0	0	0		Yes		0	0.555556	0.444444	0	0	0		Yes		0	0.8	0.2	0	0	0		Yes		0	0.666667	0.333333	0	0	0		Yes		0	0.726709
	Details of the pathology. Previous treatments			0.77551	0.204082	0	0	0	0	Yes		0	0.769231	0.192308	0	0	0		Yes		0	0.666667	0.333333	0	0	0		Yes		0	0.9	0.1	0	0	0		Yes		0	0.666667	0.333333	0	0	0		Yes		0	0.750641
	Details of the pathology.(*) Specialty that refers you			0.333333	0.277778	0.166667	0.138889	0.0833333	0	Without consensus		0	0.315789	0.315789	0.105263	0.210526	0.0526316		Without consensus		0	0.125	0.333333	0.333333	0.5	0.333333		Without consensus		0	0.454545	0.181818	0.181818	0.0909091	0.0909091		Without consensus		0	0.333333	0.333333	0.333333	0.1	0.1		Without consensus		0	0.275917
	Details of the pathology.(*) Response to previous treatments			0.770833	0.166667	0.0625	0	0	0	Yes		0	0.740741	0.185185	0.0740741	0	0		Yes		0	0.75	0.125	0.125	0	0		Yes		0	0.9	0.1	0	0	0		Yes		0	0.9	0.1	0	0	0		Yes		0	0.822685
	Details of the pathology.(*) Environmental triggering factors			0.222222	0.277778	0.166667	0.25	0.0833333	0	Without consensus		0	0.157895	0.263158	0.210526	0.315789	0.0526316		Without consensus		0	0.125	0.333333	0.333333	0.125	0.333333		Without consensus		0	0.454545	0.181818	0.0909091	0.181818	0.0909091		Without consensus		0	0.6	0.666667	0.1	0.333333	0		Without consensus		0	0.15311
	Details of the pathology.(*) Functional impact of the pathology			0.729167	0.1875	0.0625	0.0208333	0	0	Yes		0	0.703704	0.222222	0.037037	0.037037	0		Yes		0	0.625	0.125	0.25	0	0		Yes		0	0.9	0.1	0	0	0		Yes		0	0.9	0.1	0	0	0		Yes		0	0.782176
	Prescription details (prescription is understood as the main technique/intervention to be performed). Main treatment			0.959184	0.0408163	0	0	0	0	Yes		0	0.923077	0.0769231	0	0	0		Yes		0	1	0	0	0	0		Yes		0	1	0	0	0	0		Yes		0	1	0	0	0	0		Yes		0	0.980769
	Prescription details (prescription is understood as the main technique/intervention to be performed). Other associated treatments			0.734694	0.183673	0.0816327	0	0	0	Yes		0	0.730769	0.115385	0.153846	0	0		Yes		0	0.666667	0.333333	0	0	0		Yes		0	0.7	0.3	0	0	0		Yes		0	1	0	0	0	0		Yes		0	0.774359
	Prescription details (prescription is understood as the main technique/intervention to be performed). Prescription start date			0.693878	0.22449	0.0816327	0	0	0	Yes		0	0.653846	0.230769	0.115385	0	0		Yes		0	0.888889	0.111111	0	0	0		Yes		0	0.6	0.4	0	0	0		Yes		0	0.666667	0	0.333333	0	0		Without consensus		0	0.70235
	Prescription details (prescription is understood as the main technique/intervention to be performed). Number of sessions			0.571429	0.285714	0.122449	0.0204082	0	0	Yes		0	0.576923	0.307692	0.0769231	0.0384615	0		Yes		0	0.666667	0.222222	0.111111	0	0		Yes		0	0.4	0.3	0.3	0	0		Yes		0	0.666667	0.333333	0	0	0		Yes		0	0.577564
	Prescription details (prescription is understood as the main technique/intervention to be performed). Treatment frequency			0.612245	0.244898	0.122449	0	0	0	Yes		0	0.615385	0.269231	0.115385	0	0		Yes		0	0.777778	0.111111	0.111111	0	0		Yes		0	0.3	0.4	0.2	0	0		Yes		0	1	0	0	0	0		Yes		0	0.673291
[truncated: 5 more columns]

## Sheet: B3D
			Totals	5	4	3	2	1				Anesthesiology, Resuscitation and Pain Management	5	4	3	2	1				Orthopedic Surgery and Traumatology	5	4	3	2	1				Physical Medicine and Rehabilitation	5	4	3	2	1				Rheumatology	5	4	3	2	1
	General variables. Date of completion		43	0.813953	0.116279	0.0465116	0	0.0232558		Yes		26	0.769231	0.153846	0.0384615	0	0.0384615		Yes		3	0.666667	0	0.333333	0	0		Without consensus		11	0.909091	0.0909091	0	0	0		Yes		3	1	0	0	0	0		Yes
	General variables.Responsible physician		43	0.72093	0.186047	0.0232558	0.0465116	0.0232558		Yes		26	0.730769	0.230769	0	0	0.0384615		Yes		3	0.333333	0	0	0.666667	0		Without consensus		11	0.727273	0.181818	0.0909091	0	0		Yes		3	1	0	0	0	0		Yes
	General variables. Responsible nursing		42	0.0952381	0.214286	0.428571	0.119048	0.142857		Without consensus		28	0.142857	0.214286	0.357143	0.107143	0.178571		Without consensus		2	0.2	0.2	0.2	0.5	0.5		No		9	0.0909091	0.333333	0.555556	0.111111	0.181818		Without consensus		3	0	0.333333	1	0	0		Without consensus
			0	0	0	0	0	0		0		0	0	0	0	0	0		0		0	0	0	0	0	0		0		0	0	0	0	0	0		0		0	0	0	0	0	0		0
	Magnetotherapy: Variables. Type of magnetotherapy (PEMF, static, alternating)		10	0.4	0.4	0.1	0.1	0		Yes		0	0	0	0	0	0		0		0	0	0	0	0	0		0		9	0.444444	0.333333	0.111111	0.111111	0		Yes		1	0	1	0	0	0		Yes
	Magnetotherapy: Variables. Magnetic field intensity		10	0.3	0.5	0.2	0	0.2		Yes		0	0	0	0	0	0		0		0	0	0	0	0	0		0		9	0.333333	0.555556	0.111111	0	0.222222		Yes		1	0	0	1	0	0		Without consensus
	Magnetotherapy: Variables. Magnetic field frequency		10	0.3	0.4	0.1	0	0.2		Yes		0	0	0	0	0	0		0		0	0	0	0	0	0		0		9	0.333333	0.333333	0.111111	0	0.222222		Without consensus		1	0	1	0	0	0		Yes
	Magnetotherapy: Variables. Waveform		7	0.142857	0.142857	0.142857	0.285714	0.285714		Without consensus		0	0	0	0	0	0		0		0	0	0	0	0	0		0		6	0.166667	0.166667	0.166667	0.166667	0.333333		Without consensus		1	0	0	0	1	1		No
	Magnetotherapy: Variables. Duration of the magnetic pulse		7	0.142857	0.285714	0.142857	0.285714	0.142857		Without consensus		0	0	0	0	0	0		0		0	0	0	0	0	0		0		6	0.166667	0.333333	0.166667	0.166667	0.166667		Without consensus		1	0	0	0	1	1		No
	Magnetotherapy: Variables. Polarity of the magnetic pulse		7	0.1	0.285714	0.428571	0.285714	0.3		Without consensus		0	0	0	0	0	0		0		0	0	0	0	0	0		0		6	0.111111	0.333333	0.5	0.166667	0.222222		Without consensus		1	0	0	0	1	1		No
	Magnetotherapy: Variables. Equipment used and manufacturer		7	0.1	0.285714	0.428571	0.142857	0.142857		Without consensus		0	0	0	0	0	0		0		0	0	0	0	0	0		0		6	0.111111	0.333333	0.5	0.111111	0.166667		Without consensus		1	0	1	0	1	1		No
	Magnetotherapy: Variables. Area of application		10	0.7	0.3	0	0	0		Yes		0	0	0	0	0	0		0		0	0	0	0	0	0		0		9	0.777778	0.222222	0	0	0		Yes		1	0	1	0	0	0		Yes
	Magnetotherapy: Variables. Distance from the field emission source		7	0.1	0.142857	0.571429	0.142857	0.142857		Without consensus		0	0	0	0	0	0		0		0	0	0	0	0	0		0		6	0.111111	0.166667	0.666667	0.111111	0.166667		Without consensus		1	0	0	0	1	1		No
	Magnetotherapy: Variables. Impedance and penetration of the magnetic field		7	0.285714	0.285714	0.1	0.142857	0.285714		Without consensus		0	0	0	0	0	0		0		0	0	0	0	0	0		0		6	0.333333	0.333333	0.111111	0.111111	0.333333		Without consensus		1	0	0	0	1	1		No
	Magnetotherapy: Variables. Applicator or coil size		7	0.142857	0.142857	0.428571	0.142857	0.142857		Without consensus		0	0	0	0	0	0		0		0	0	0	0	0	0		0		6	0.166667	0.166667	0.5	0.111111	0.166667		Without consensus		1	0	0	0	1	1		No
	Magnetotherapy: Variables. Number of sessions		10	0.5	0.5	0	0	0		Yes		0	0	0	0	0	0		0		0	0	0	0	0	0		0		9	0.555556	0.444444	0	0	0		Yes		1	0	1	0	0	0		Yes
	Magnetotherapy: Variables. Interval between sessions		10	0.4	0.3	0.3	0	0		Yes		0	0	0	0	0	0		0		0	0	0	0	0	0		0		9	0.444444	0.333333	0.222222	0	0		Yes		1	0	0	1	0	0		Without consensus
	Magnetotherapy: Variables. Duration of each session		10	0.6	0.3	0.1	0.2	0		Yes		0	0	0	0	0	0		0		0	0	0	0	0	0		0		9	0.666667	0.222222	0.111111	0.222222	0		Yes		1	0	1	1	0	0		Yes
			0	0	0	0	0	0		0		0	0	0	0	0	0		0		0	0	0	0	0	0		0		0	0	0	0	0	0		0		0	0	0	0	0	0		0
			0	0	0	0	0	0		0		0	0	0	0	0	0		0		0	0	0	0	0	0		0		0	0	0	0	0	0		0		0	0	0	0	0	0		0
	Shock waves: Variable. Type of shock waves (radial RSWT, focal ESWT)		13	0.846154	0.153846	0	0	0		Yes		1	1	0	0	0	0		Yes		0	0	0	0	0	0		0		11	0.909091	0.0909091	0	0	0		Yes		1	0	1	0	0	0		Yes
	Shock waves: Variables. Product and manufacturer used		11	0.0833333	0.3	0.5	0.0833333	0.2		Without consensus		1	0	1	0	0	0		Yes		0	0	0	0	0	0		0		9	0.0909091	0.333333	0.555556	0.0909091	0.111111		Without consensus		1	0	0	0	0	1		No
	Shock waves: Variable. Energy applied per pulse		13	0.846154	0.0769231	0	0	0.0769231		Yes		1	1	0	0	0	0		Yes		0	0	0	0	0	0		0		11	0.909091	0.0909091	0	0	0		Yes		1	0	0	0	0	1		No
	Shock waves: Variable. Pulse frequency		13	0.5	0.25	0.0833333	0.0769231	0.166667		Without consensus		1	1	0	0	0	0		Yes		0	0	0	0	0	0		0		11	0.545455	0.272727	0.0909091	0.0909091	0.0909091		Yes		1	0	0	0	0	1		No
	Shock waves: Variable. Number of impulses per session		13	0.615385	0.307692	0	0	0.0769231		Yes		1	0	1	0	0	0		Yes		0	0	0	0	0	0		0		11	0.727273	0.272727	0	0	0		Yes		1	0	0	0	0	1		No
	Shock waves: Variables. Pressure waveform		13	0.0833333	0.666667	0.166667	0.153846	0.0833333		Yes		1	1	0	0	0	0		Yes		0	0	0	0	0	0		0		11	0.0909091	0.636364	0.181818	0.181818	0.0909091		Yes		1	0	1	0	0	1		Yes
	Shock waves: Variables. Maximum pressure of the wave		13	0.384615	0.153846	0.230769	0.0769231	0.153846		Without consensus		1	1	0	0	0	0		Yes		0	0	0	0	0	0		0		11	0.363636	0.181818	0.272727	0.0909091	0.0909091		Without consensus		1	0	0	0	0	1		No
	Shock waves: Variable. Application mode: Radial / Focal		13	0.846154	0.153846	0	0	0		Yes		1	1	0	0	0	0		Yes		0	0	0	0	0	0		0		11	0.909091	0.0909091	0	0	0		Yes		1	0	1	0	0	0		Yes
	Shock waves: Variable. Focal length of the device		11	0.2	0.2	0.3	0	0.3		Without consensus		1	1	0	0	0	0		Yes		0	0	0	0	0	0		0		9	0.222222	0.222222	0.333333	0	0.222222		Without consensus		1	0	0	0	0	1		No
	Shock waves: Variables. Area of application		13	0.923077	0.0769231	0	0	0		Yes		1	1	0	0	0	0		Yes		0	0	0	0	0	0		0		11	0.909091	0.0909091	0	0	0		Yes		1	1	0	0	0	0		Yes
	Shock waves: Variable. Number of sessions		13	0.692308	0.307692	0	0	0		Yes		1	0	1	0	0	0		Yes		0	0	0	0	0	0		0		11	0.727273	0.272727	0	0	0		Yes		1	1	0	0	0	0		Yes
	Shock waves: Variables. Interval between sessions		13	0.538462	0.384615	0.0769231	0	0		Yes		1	0	1	0	0	0		Yes		0	0	0	0	0	0		0		11	0.636364	0.272727	0.0909091	0	0		Yes		1	0	1	0	0	0		Yes
	Shock waves: Variable. Duration of each session		11	0.3	0.3	0.3	0.153846	0.1		Without consensus		1	0	1	0	0	0		Yes		0	0	0	0	0	0		0		9	0.333333	0.333333	0.222222	0.181818	0.111111		Without consensus		1	0	1	1	0	1		Without consensus
	Shock waves: Variable.(*) Type of Application Head		12	0.5	0.333333	0.0833333	0	0.0833333		Yes		0	0	0	0	0	0		0		0	0	0	0	0	0		0		11	0.545455	0.363636	0.0909091	0	0		Yes		1	0	0	0	0	1		No
			0	0	0	0	0	0		0		0	0	0	0	0	0		0		0	0	0	0	0	0		0		0	0	0	0	0	0		0		0	0	0	0	0	0		0
			0	0	0	0	0	0		0		0	0	0	0	0	0		0		0	0	0	0	0	0		0		0	0	0	0	0	0		0		0	0	0	0	0	0		0
	Cryotherapy: Variables. Type (whole body WBC, local, pneumatic compression, immersion (ice baths))		5	0.5	0.285714	0.5	0	0		Without consensus		1	0	0	1	0	0		Without consensus		0	0	0	0	0	0		0		4	0.5	0.333333	0.5	0	0		Without consensus		0	0	0	0	0	0		0
	Cryotherapy: Variables. Equipment and manufacturer used		5	0	0.25	0.142857	0.25	0.5		Without consensus		1	0	0	0	0	1		No		0	0	0	0	0	0		0		4	0	0.25	0.166667	0.25	0.5		Without consensus		0	0	0	0	0	0		0
	Cryotherapy: Variables.Temperature		5	0.75	0.142857	0.25	0.142857	0.142857		Yes		1	0	0	1	0	0		Without consensus		0	0	0	0	0	0		0		4	0.75	0.166667	0.25	0.142857	0.142857		Yes		0	0	0	0	0	0		0
	Cryotherapy: Variables. Tissue cooling rate		5	0.142857	0.25	0.25	0	0.5		Without consensus		1	0	0	1	0	0		Without consensus		0	0	0	0	0	0		0		4	0.166667	0.25	0.25	0	0.5		Without consensus		0	0	0	0	0	0		0
	Cryotherapy: Variables. Cooling method		5	0.25	0.285714	0.75	0	0.142857		Without consensus		1	0	0	1	0	0		Without consensus		0	0	0	0	0	0		0		4	0.25	0.333333	0.75	0	0.142857		Without consensus		0	0	0	0	0	0		0
	Cryotherapy: Variables. Area of application		7	1	0	0	0	0		Yes		0	0	0	0	0	0		0		0	0	0	0	0	0		0		7	1	0	0	0	0		Yes		0	0	0	0	0	0		0
	Cryotherapy: Variables. Number of sessions		7	0.714286	0.285714	0	0	0		Yes		0	0	0	0	0	0		0		0	0	0	0	0	0		0		7	0.714286	0.285714	0	0	0		Yes		0	0	0	0	0	0		0
	Cryotherapy: Variables. Interval between sessions		7	0.428571	0.285714	0.285714	0	0		Yes		0	0	0	0	0	0		0		0	0	0	0	0	0		0		7	0.428571	0.285714	0.285714	0	0		Yes		0	0	0	0	0	0		0
	Cryotherapy: Variables. Duration of each session		7	0.428571	0.285714	0.142857	0.142857	0		Yes		0	0	0	0	0	0		0		0	0	0	0	0	0		0		7	0.428571	0.285714	0.142857	0.142857	0		Yes		0	0	0	0	0	0		0
			0	0	0	0	0	0		0		0	0	0	0	0	0		0		0	0	0	0	0	0		0		0	0	0	0	0	0		0		0	0	0	0	0	0		0
			0	0	0	0	0	0		0		0	0	0	0	0	0		0		0	0	0	0	0	0		0		0	0	0	0	0	0		0		0	0	0	0	0	0		0
	Physiotherapy or manual therapy: Variables. Type (massage therapy, joint mobilization, myofascial therapy, combination)		13	0.923077	0.0769231	0	0	0		Yes		1	1	0	0	0	0		Yes		0	0	0	0	0	0		0		10	0.9	0.1	0	0	0		Yes		2	1	0	0	0	0		Yes
	Physiotherapy or Manual Therapy: Variables. Associated strengthening exercises		13	0.846154	0.0769231	0.0769231	0	0		Yes		1	0	0	1	0	0		Without consensus		0	0	0	0	0	0		0		10	0.9	0.1	0	0	0		Yes		2	1	0	0	0	0		Yes
	Physiotherapy or manual therapy: Variables. Area of application		13	0.769231	0.230769	0	0	0		Yes		1	1	0	0	0	0		Yes		0	0	0	0	0	0		0		10	0.7	0.3	0	0	0		Yes		2	1	0	0	0	0		Yes
	Physiotherapy or Manual Therapy: Variables. Number of sessions		13	0.692308	0.230769	0.0769231	0	0		Yes		1	1	0	0	0	0		Yes		0	0	0	0	0	0		0		10	0.7	0.2	0.1	0	0		Yes		2	0.5	0.5	0	0	0		Yes
	Physiotherapy or Manual Therapy: Variables. Interval between sessions		13	0.538462	0.230769	0.230769	0	0		Yes		1	1	0	0	0	0		Yes		0	0	0	0	0	0		0		10	0.5	0.3	0.2	0	0		Yes		2	0.5	0	0.5	0	0		Without consensus
	Physiotherapy or Manual Therapy: Variables. Duration of each session		13	0.166667	0.75	0.0833333	0.153846	0		Yes		1	0	0	0	1	0		No		0	0	0	0	0	0		0		10	0.2	0.7	0.1	0.1	0		Yes		2	0.5	1	0	0	0		Yes
			0	0	0	0	0	0		0		0	0	0	0	0	0		0		0	0	0	0	0	0		0		0	0	0	0	0	0		0		0	0	0	0	0	0		0
			0	0	0	0	0	0		0		0	0	0	0	0	0		0		0	0	0	0	0	0		0		0	0	0	0	0	0		0		0	0	0	0	0	0		0
	Dry needling: Variables.Needle length		6	0.333333	0.166667	0.1	0.1	0.5		Without consensus		1	1	0	0	0.5	0.5		Yes		0	0	0	0	0	0		0		4	0.25	0.25	0.125	0	0.5		Without consensus		1	0	0	0	0	1		No
	Dry needling: Variables. Needle gauge		7	0.285714	0.142857	0.142857	0	0.428571		Without consensus		1	0	0	0	0	1		No		0	0	0	0	0	0		0		6	0.333333	0.166667	0.166667	0	0.333333		Without consensus		0	0	0	0	0	0		0
	Dry needling: Variables. Material and type of needle		6	0.166667	0.166667	0.166667	0.2	0.5		Without consensus		1	0	0	0	0.5	1		No		0	0	0	0	0	0		0		4	0.25	0.25	0.25	0.125	0.25		Without consensus		1	0	0	0	0	1		No
	Dry needling: Variables. Insertion time		6	0.333333	0.3	0.5	0	0.166667		Without consensus		1	0.5	0.5	0	0	1		No		0	0	0	0	0	0		0		4	0.5	0.25	0.5	0	0.125		Without consensus		1	0	0	1	0	0		Without consensus
	Dry needling: Variables. Stimulation with movements (Fanning): Yes/No		7	0.285714	0.142857	0.285714	0.142857	0.142857		Without consensus		1	0	0	0	1	0		No		0	0	0	0	0	0		0		6	0.333333	0.166667	0.333333	0	0.166667		Without consensus		0	0	0	0	0	0		0
	Dry needling: Variables. Area of application		7	0.857143	0.142857	0	0	0		Yes		1	1	0	0	0	0		Yes		0	0	0	0	0	0		0		6	0.833333	0.166667	0	0	0		Yes		0	0	0	0	0	0		0
	Dry needling: Variables. Number of sessions		7	0.857143	0.142857	0	0	0		Yes		1	1	0	0	0	0		Yes		0	0	0	0	0	0		0		6	0.833333	0.166667	0	0	0		Yes		0	0	0	0	0	0		0
	Dry needling: Variables. Interval between sessions		7	0.428571	0.571429	0	0	0		Yes		1	1	0	0	0	0		Yes		0	0	0	0	0	0		0		6	0.333333	0.666667	0	0	0		Yes		0	0	0	0	0	0		0
	Dry needling: Variables. Duration of each session		6	0.333333	0.166667	0.5	0	0.1		Without consensus		1	1	0.5	0	0	1		Yes		0	0	0	0	0	0		0		4	0.25	0.25	0.5	0	0.125		Without consensus		1	0	0	1	0	0		Without consensus
			0	0	0	0	0	0		0		0	0	0	0	0	0		0		0	0	0	0	0	0		0		0	0	0	0	0	0		0		0	0	0	0	0	0		0
			0	0	0	0	0	0		0		0	0	0	0	0	0		0		0	0	0	0	0	0		0		0	0	0	0	0	0		0		0	0	0	0	0	0		0
	Rest: Variables.Duration		26	0.653846	0.269231	0.0769231	0	0		Yes		12	0.833333	0.0833333	0.0833333	0	0		Yes		3	0.666667	0.333333	0	0	0		Yes		10	0.5	0.4	0.1	0	0		Yes		1	0	1	0	0	0		Yes
	Rest: Variables. Rest type: Absolute / Relative		26	0.807692	0.153846	0.0384615	0	0		Yes		12	0.75	0.166667	0.0833333	0	0		Yes		3	0.666667	0.333333	0	0	0		Yes		10	1	0	0	0	0		Yes		1	0	1	0	0	0		Yes
	Rest: Variables. Mobilization: No / Passive / Controlled		26	0.653846	0.230769	0.0769231	0	0.0384615		Yes		12	0.666667	0.166667	0.0833333	0	0.0833333		Yes		3	0.666667	0	0.333333	0	0		Without consensus		10	0.7	0.3	0	0	0		Yes		1	0	1	0	0	0		Yes
	Rest: Variables.(*) Rest duration time		27	0.518519	0.296296	0.148148	0	0.037037		Yes		12	0.583333	0.333333	0	0	0.0833333		Yes		3	0.666667	0.333333	0	0	0		Yes		10	0.5	0.2	0.3	0	0		Yes		2	0	0.5	0.5	0	0		Without consensus
	Rest: Variables.(*) Daily rest time		27	0.37037	0.222222	0.296296	0.037037	0.0740741		Without consensus		12	0.5	0.0833333	0.25	0.0833333	0.0833333		Without consensus		3	0	0.333333	0.666667	0	0		Without consensus		10	0.4	0.3	0.2	0	0.1		Yes		2	0	0.5	0.5	0	0		Without consensus
	Rest: Variables.(*) Associated exercises		27	0.592593	0.333333	0.037037	0	0.037037		Yes		12	0.5	0.333333	0.0833333	0	0.0833333		Yes		3	0.333333	0.666667	0	0	0		Yes		10	0.8	0.2	0	0	0		Yes		2	0.5	0.5	0	0	0		Yes
			0	0	0	0	0	0		0		0	0	0	0	0	0		0		0	0	0	0	0	0		0		0	0	0	0	0	0		0		0	0	0	0	0	0		0
	Infiltrations of medications or other substances (Blockages)		0	0	0	0	0	0		Without consensus		0	0	0	0	0	0		0		0	0	0	0	0	0		0		0	0	0	0	0	0		0		0	0	0	0	0	0		0
	Infiltrations or Blockages: Variables. Group of medication used		43	0.883721	0.0232558	0.0697674	0	0.0232558		Yes		26	0.884615	0.0384615	0.0384615	0	0.0384615		Yes		3	1	0	0	0	0		Yes		11	0.909091	0	0.0909091	0	0		Yes		3	0.666667	0	0.333333	0	0		Without consensus
	Infiltrations or Blockages: Variables. Name of the medication / Active ingredient		43	0.883721	0.0697674	0.0465116	0	0		Yes		26	0.884615	0.0769231	0.0384615	0	0		Yes		3	1	0	0	0	0		Yes		11	0.909091	0	0.0909091	0	0		Yes		3	0.666667	0.333333	0	0	0		Yes
	Infiltrations or Blockages: Variables. Manufacturer		40	0.05	0.175	0.475	0.075	0.225		Without consensus		27	0.037037	0.148148	0.518519	0.0740741	0.222222		Without consensus		2	0	0	0.5	0.333333	1		No		9	0.0909091	0.333333	0.444444	0.111111	0.111111		Without consensus		2	0.5	0.333333	0.5	0.333333	0.333333		Without consensus
	Infiltrations or Blockages: Variables. Concomitant medication or substance		43	0.55814	0.27907	0.0697674	0.0697674	0.0232558		Yes		26	0.538462	0.269231	0.0384615	0.115385	0.0384615		Yes		3	0.333333	0	0.666667	0	0		Without consensus		11	0.545455	0.454545	0	0	0		Yes		3	1	0	0	0	0		Yes
	Infiltrations or Blockages: Variables. Expected administered dose		43	0.697674	0.186047	0.0697674	0.0232558	0.0232558		Yes		26	0.692308	0.192308	0.0769231	0	0.0384615		Yes		3	0.666667	0	0.333333	0	0		Without consensus		11	0.727273	0.181818	0	0.0909091	0		Yes		3	0.666667	0.333333	0	0	0		Yes
	Infiltrations or Blockages: Variables. Expected administered volume		43	0.534884	0.302326	0.116279	0.0232558	0.0232558		Yes		26	0.5	0.346154	0.115385	0	0.0384615		Yes		3	0.333333	0.333333	0.333333	0	0		Without consensus		11	0.727273	0.181818	0	0.0909091	0		Yes		3	0.333333	0.333333	0.333333	0	0		Without consensus
	Infiltrations or Blockages: Variables. Dose magnitude (mg, ml, concentration, ...)		43	0.744186	0.209302	0.0465116	0	0		Yes		26	0.769231	0.192308	0.0384615	0	0		Yes		3	0.666667	0	0.333333	0	0		Without consensus		11	0.727273	0.272727	0	0	0		Yes		3	0.666667	0.333333	0	0	0		Yes
	Infiltrations or Blockages: Variables.Lot		40	0.05	0.025	0.25	0.15	0.525		Without consensus		27	0.037037	0.037037	0.185185	0.185185	0.555556		Without consensus		2	0	0	0.5	0.5	0.5		No		9	0.111111	0.181818	0.444444	0.0909091	0.444444		Without consensus		2	0.333333	0.333333	0.5	0.333333	0.5		Without consensus
	Infiltrations or Blockages: Variables. Expiration Date		40	0.35	0.175	0.15	0.1	0.225		Without consensus		27	0.37037	0.185185	0.037037	0.111111	0.296296		Without consensus		2	0.5	0.25	0.25	0.5	0.25		Without consensus		9	0.333333	0.222222	0.333333	0.0909091	0.111111		Without consensus		2	0.333333	0	1	0.333333	0		Without consensus
	Infiltrations or Blockages: Variables. Number of infiltration locations		43	0.744186	0.139535	0.0697674	0	0.0465116		Yes		26	0.846154	0.0769231	0	0	0.0769231		Yes		3	0.333333	0.333333	0.333333	0	0		Without consensus		11	0.727273	0.272727	0	0	0		Yes		3	0.333333	0	0.666667	0	0		Without consensus
	Infiltrations or Blockages: Variables. Type of infiltrated tissue		43	0.767442	0.139535	0.0232558	0.0232558	0.0465116		Yes		26	0.730769	0.153846	0.0384615	0	0.0769231		Yes		3	0.666667	0.333333	0	0	0		Yes		11	0.909091	0	0	0.0909091	0		Yes		3	0.666667	0.333333	0	0	0		Yes
	Infiltrations or Blockages: Variables. Anatomical location		43	0.883721	0.116279	0	0	0		Yes		26	0.884615	0.115385	0	0	0		Yes		3	1	0	0	0	0		Yes		11	0.909091	0.0909091	0	0	0		Yes		3	0.666667	0.333333	0	0	0		Yes
	Infiltrations or Blockages: Variables. Final volume administered		43	0.744186	0.139535	0.116279	0	0		Yes		26	0.807692	0.115385	0.0769231	0	0		Yes		3	0.333333	0.333333	0.333333	0	0		Without consensus		11	0.818182	0	0.181818	0	0		Yes		3	0.333333	0.666667	0	0	0		Yes
	Infiltrations or Blockages: Variables. Final dose administered		43	0.790698	0.162791	0.0232558	0.0232558	0		Yes		26	0.769231	0.192308	0.0384615	0	0		Yes		3	0.666667	0	0	0.333333	0		Without consensus		11	0.909091	0.0909091	0	0	0		Yes		3	0.666667	0.333333	0	0	0		Yes
	Infiltrations or Blockages: Variables. Image-guided (No, ultrasound, fluoroscope,...)		43	0.930233	0.0697674	0	0	0		Yes		26	0.923077	0.0769231	0	0	0		Yes		3	1	0	0	0	0		Yes		11	1	0	0	0	0		Yes		3	0.666667	0.333333	0	0	0		Yes
			0	0	0	0	0	0		0		0	0	0	0	0	0		0		0	0	0	0	0	0		0		0	0	0	0	0	0		0		0	0	0	0	0	0		0
	Infiltration of blood products		0	0	0	0	0	0		Without consensus		0	0	0	0	0	0		0		0	0	0	0	0	0		0		0	0	0	0	0	0		0		0	0	0	0	0	0		0
	Infiltration of Blood Products: Variables 1 (Collection and Analysis). Initial blood volume		41	0.609756	0.146341	0.146341	0.0243902	0.0731707		Yes		23	0.608696	0.173913	0.130435	0	0.0869565		Yes		4	0.5	0	0	0.25	0.25		Without consensus		11	0.818182	0.0909091	0.0909091	0	0		Yes		3	0	0.333333	0.666667	0.333333	0		Without consensus
	Infiltration of blood products: Variables 1 (Collection and Analysis). Quantity of anticoagulant		38	0.263158	0.394737	0.157895	0.0526316	0.131579		Without consensus		24	0.333333	0.333333	0.125	0.0833333	0.125		Without consensus		2	0.666667	1	0	0.25	0.5		Yes		9	0.222222	0.444444	0.222222	0.0909091	0.111111		Without consensus		3	0.333333	0.333333	0.333333	0.333333	0.333333		Without consensus
	Infiltration of blood products: Variables 1 (Collection and Analysis). Anticoagulant units (% or mg)		38	0.236842	0.236842	0.315789	0.0789474	0.131579		Without consensus		24	0.291667	0.25	0.208333	0.125	0.125		Without consensus		2	0.5	0.25	0.333333	0.25	0.5		Without consensus		9	0.111111	0.333333	0.555556	0.0909091	0		Without consensus		3	0	0.333333	0.666667	0.666667	0.333333		Without consensus
	Infiltration of blood products: Variables 1 (Collection and Analysis). Type of anticoagulant		38	0.5	0.210526	0.131579	0.0526316	0.105263		Without consensus		24	0.5	0.125	0.166667	0.0833333	0.125		Without consensus		2	0.5	0.5	0.25	0.333333	0.25		Yes		9	0.555556	0.444444	0.0909091	0.0909091	0.1		Yes		3	0.333333	0	0.333333	0.666667	0.333333		Without consensus
	Infiltration of Blood Products: Variables 1 (Collection and Analysis). Type of system (Open/Closed)		38	0.631579	0.131579	0.157895	0.0263158	0.0526316		Yes		22	0.5	0.227273	0.136364	0.0454545	0.0909091		Yes		3	0.666667	0	0.333333	0	0		Without consensus		10	0.9	0	0.1	0	0		Yes		3	0.666667	0	0.333333	0	0		Without consensus
	Infiltration of Blood Products: Variables 1 (Collection and Analysis). Product / Manufacturer used		38	0.342105	0.315789	0.184211	0.0526316	0.105263		Without consensus		24	0.291667	0.25	0.208333	0.0833333	0.166667		Without consensus		2	0.5	0.5	0.333333	0.25	0		Yes		9	0.444444	0.333333	0.222222	0	0.1		Yes		3	0.333333	0.666667	0.333333	0	0		Yes
	Infiltration of Blood Products: Variables 1 (Collection and Analysis). Device lot		38	0.0526316	0.184211	0.157895	0.157895	0.447368		Without consensus		24	0.130435	0.208333	0.166667	0.125	0.5		Without consensus		2	0.25	0	0.333333	0.5	1		No		9	0.222222	0.222222	0.111111	0.222222	0.222222		Without consensus		3	0.333333	0.333333	0.333333	0.333333	0.333333		Without consensus
	Infiltration of blood products: Variables 1 (Collection and Analysis). Device expiration		38	0.315789	0.131579	0.236842	0.0789474	0.236842		Without consensus		22	0.272727	0.136364	0.181818	0.0454545	0.363636		Without consensus		3	0	0	0.333333	0.333333	0.333333		Without consensus		10	0.6	0.1	0.2	0.1	0		Yes		3	0	0.333333	0.666667	0	0		Without consensus
	Infiltration of blood products: Variables 1 (Collection and Analysis). Number of centrifugations		38	0.342105	0.210526	0.263158	0.105263	0.0789474		Without consensus		22	0.272727	0.272727	0.227273	0.0909091	0.136364		Without consensus		3	0.666667	0	0.333333	0	0		Without consensus		10	0.5	0.1	0.2	0.2	0		Without consensus		3	0	0.333333	0.666667	0	0		Without consensus
	Infiltration of Blood Products: Variables 1 (Collection and Analysis). Centrifugation speed and time		41	0.536585	0.170732	0.170732	0.0731707	0.0487805		Without consensus		23	0.521739	0.0869565	0.26087	0.0869565	0.0434783		Without consensus		4	0.5	0.25	0.333333	0	0.25		Without consensus		11	0.636364	0.272727	0.0909091	0.2	0		Yes		3	0.333333	0.333333	0.666667	0.333333	0		Without consensus
	Infiltration of Blood Products: Variables 1 (Collection and Analysis). Type of centrifuge used		38	0.236842	0.210526	0.394737	0.0526316	0.105263		Without consensus		24	0.333333	0.0416667	0.375	0.0833333	0.166667		Without consensus		2	0.25	1	0.25	0	0.25		Yes		9	0.111111	0.444444	0.444444	0.0909091	0.1		Without consensus		3	0	0.333333	0.666667	0.333333	0		Without consensus
	Infiltration of blood products: Variables 1 (Collection and Analysis). Final volume of PRP obtained		38	0.868421	0.131579	0	0	0		Yes		22	0.863636	0.136364	0	0	0		Yes		3	1	0	0	0	0		Yes		10	0.9	0.1	0	0	0		Yes		3	0.666667	0.333333	0	0	0		Yes
	Infiltration of blood products: Variables 1 (Collection and Analysis). Final appearance of the PRP		38	0.447368	0.315789	0.210526	0	0.0263158		Yes		22	0.5	0.136364	0.318182	0	0.0454545		Without consensus		3	1	0	0	0	0		Yes		10	0.3	0.6	0.1	0	0		Yes		3	0	1	0	0	0		Yes
	Infiltration of blood products: Variables 1 (Collection and Analysis). Analysis of the patient's whole blood (cell concentrations)		38	0.421053	0.263158	0.184211	0.0789474	0.0526316		Without consensus		22	0.5	0.181818	0.181818	0.0909091	0.0454545		Without consensus		3	0.666667	0	0.333333	0	0		Without consensus		10	0.3	0.4	0.1	0.1	0.1		Yes		3	0	0.666667	0.333333	0	0		Without consensus
	Infiltration of blood products: Variables 1 (Collection and Analysis). Analysis of the plasma sample (cell concentrations)		38	0.578947	0.236842	0.105263	0.0526316	0.0263158		Yes		22	0.636364	0.181818	0.0909091	0.0909091	0		Yes		3	0.666667	0.333333	0	0	0		Yes		10	0.6	0.2	0.1	0	0.1		Yes		3	0	0.666667	0.333333	0	0		Without consensus
	Infiltration of blood products: Variables 1 (Collection and Analysis). Plasma activation		38	0.578947	0.236842	0.131579	0	0.0526316		Yes		22	0.636364	0.136364	0.136364	0	0.0909091		Yes		3	0.666667	0.333333	0	0	0		Yes		10	0.6	0.3	0.1	0	0		Yes		3	0	0.666667	0.333333	0	0		Without consensus
	Infiltration of blood products: Variables 1 (Collection and Analysis). Type of activator		38	0.447368	0.263158	0.131579	0.105263	0.0526316		Yes		22	0.5	0.136364	0.136364	0.136364	0.0909091		Without consensus		3	0.666667	0.333333	0	0	0		Yes		10	0.4	0.4	0.1	0.1	0		Yes		3	0	0.666667	0.333333	0	0		Without consensus
	Infiltration of blood products: Variables 1 (Collection and Analysis). Quantity of activator		38	0.447368	0.131579	0.315789	0.0263158	0.0789474		Without consensus		24	0.5	0.0416667	0.291667	0.0416667	0.125		Without consensus		2	0.5	0.5	0.333333	0	0		Yes		9	0.333333	0.222222	0.444444	0.0909091	0		Without consensus		3	0.333333	0.333333	0.333333	0.333333	0		Without consensus
	Infiltration of blood products: Variables 1 (Collection and Analysis). Final form of the product (clot, liquid, eye drops, etc.)		38	0.5	0.236842	0.157895	0.0526316	0.0526316		Yes		22	0.545455	0.136364	0.181818	0.0454545	0.0909091		Without consensus		3	1	0	0	0	0		Yes		10	0.4	0.5	0	0.1	0		Yes		3	0	0.333333	0.666667	0	0		Without consensus
	Infiltration of blood products: Variables 2 (Infiltration). Number of infiltration locations		38	0.789474	0.157895	0.0263158	0	0.0263158		Yes		22	0.818182	0.0909091	0.0454545	0	0.0454545		Yes		3	1	0	0	0	0		Yes		10	0.7	0.3	0	0	0		Yes		3	0.666667	0.333333	0	0	0		Yes
	Infiltration of blood products: Variables 2 (Infiltration). Type of infiltrated tissue		38	0.789474	0.131579	0.0263158	0.0263158	0.0263158		Yes		22	0.818182	0.0909091	0.0454545	0	0.0454545		Yes		3	1	0	0	0	0		Yes		10	0.7	0.2	0	0.1	0		Yes		3	0.666667	0.333333	0	0	0		Yes
	Infiltration of blood products: Variables 2 (Infiltration). Anatomical location		38	0.868421	0.131579	0	0	0		Yes		22	0.909091	0.0909091	0	0	0		Yes		3	1	0	0	0	0		Yes		10	0.8	0.2	0	0	0		Yes		3	0.666667	0.333333	0	0	0		Yes
	Infiltration of blood products: Variables 2 (Infiltration). Volume administered		38	0.815789	0.131579	0.0526316	0	0		Yes		22	0.818182	0.136364	0.0454545	0	0		Yes		3	1	0	0	0	0		Yes		10	0.8	0.1	0.1	0	0		Yes		3	0.666667	0.333333	0	0	0		Yes
	Infiltration of blood products: Variables 2 (Infiltration). Administered dose		38	0.842105	0.105263	0.0263158	0	0.0263158		Yes		22	0.818182	0.0909091	0.0454545	0	0.0454545		Yes		3	1	0	0	0	0		Yes		10	0.9	0.1	0	0	0		Yes		3	0.666667	0.333333	0	0	0		Yes
	Infiltration of blood products: Variables 2 (Infiltration). Image-guided (No, ultrasound, fluoroscope, ...)		38	0.894737	0.105263	0	0	0		Yes		22	0.909091	0.0909091	0	0	0		Yes		3	1	0	0	0	0		Yes		10	0.9	0.1	0	0	0		Yes		3	0.666667	0.333333	0	0	0		Yes
	Infiltration of blood products: Variables 1 (Collection and Analysis).(*) Technical difficulties: Yes/No		41	0.609756	0.195122	0.170732	0	0.0243902		Yes		23	0.565217	0.217391	0.173913	0	0.0434783		Yes		4	0.5	0	0.5	0	0		Without consensus		11	0.727273	0.181818	0.0909091	0	0		Yes		3	0.666667	0.333333	0	0	0		Yes
			0	0	0	0	0	0		0		0	0	0	0	0	0		0		0	0	0	0	0	0		0		0	0	0	0	0	0		0		0	0	0	0	0	0		0
	Electrical neuromodulation techniques: TENS		0	0	0	0	0	0		Without consensus		0	0	0	0	0	0		0		0	0	0	0	0	0		0		0	0	0	0	0	0		0		0	0	0	0	0	0		0
	Electrical neuromodulation techniques: TENS (variables). Product / Manufacturer		25	0.12	0.28	0.12	0.08	0.4		Without consensus		16	0.1875	0.25	0.125	0.0625	0.375		Without consensus		0	0	0	0	0	0		0		8	0.181818	0.375	0.125	0.125	0.375		Without consensus		1	0	0	1	0	1		No
	Electrical neuromodulation techniques: TENS (variables). Stimulation frequency		25	0.48	0.24	0.16	0.08	0.04		Yes		14	0.5	0.285714	0.142857	0	0.0714286		Yes		0	0	0	0	0	0		0		11	0.454545	0.181818	0.181818	0.181818	0		Without consensus		0	0	0	0	0	0		0
	Electrical neuromodulation techniques: TENS (variables). Pulse width		25	0.4	0.36	0.12	0.08	0.04		Yes		14	0.5	0.357143	0.0714286	0	0.0714286		Yes		0	0	0	0	0	0		0		11	0.272727	0.363636	0.181818	0.181818	0		Without consensus		0	0	0	0	0	0		0
	Electrical neuromodulation techniques: TENS (variables). Intensity perceived by the patient		27	0.518519	0.185185	0.111111	0.111111	0.0740741		Without consensus		16	0.5	0.1875	0.0625	0.125	0.125		Without consensus		0	0	0	0	0	0		0		10	0.6	0.2	0.1	0.1	0		Yes		1	0	0	1	0	0		Without consensus
	Electrical neuromodulation techniques: TENS (variables). Current type: Biphasic / Monophasic / Alternating		25	0.4	0.44	0.08	0.04	0.04		Yes		14	0.357143	0.428571	0.0714286	0.0714286	0.0714286		Yes		0	0	0	0	0	0		0		11	0.454545	0.454545	0.0909091	0	0		Yes		0	0	0	0	0	0		0
	Electrical neuromodulation techniques: TENS (variables). Device allows modulation of intensity / amplitude / frequency: Yes / No		25	0.52	0.2	0.16	0.04	0.08		Without consensus		16	0.5625	0.125	0.125	0.0625	0.125		Without consensus		0	0	0	0	0	0		0		8	0.5	0.375	0.125	0.1	0		Yes		1	0	1	1	0	0		Without consensus
	Electrical neuromodulation techniques: TENS (variables). Session duration		25	0.48	0.28	0.16	0.04	0.04		Yes		14	0.571429	0.285714	0.142857	0	0		Yes		0	0	0	0	0	0		0		11	0.363636	0.272727	0.181818	0.0909091	0.0909091		Without consensus		0	0	0	0	0	0		0
	Electrical neuromodulation techniques: TENS (variables). Treatment frequency		25	0.64	0.24	0.12	0	0		Yes		14	0.642857	0.214286	0.142857	0	0		Yes		0	0	0	0	0	0		0		11	0.636364	0.272727	0.0909091	0	0		Yes		0	0	0	0	0	0		0
	Electrical neuromodulation techniques: TENS (variables).Location		25	0.8	0.16	0.04	0	0		Yes		14	0.714286	0.214286	0.0714286	0	0		Yes		0	0	0	0	0	0		0		11	0.909091	0.0909091	0	0	0		Yes		0	0	0	0	0	0		0
	Electrical neuromodulation techniques: TENS (variables). Device lot no.		27	0.037037	0.111111	0.148148	0.148148	0.555556		Without consensus		16	0.0625	0.0625	0.125	0.1875	0.5625		Without consensus		0	0	0	0	0	0		0		10	0	0.2	0.2	0.1	0.5		Without consensus		1	0	0	0	0	1		No
			0	0	0	0	0	0		0		0	0	0	0	0	0		0		0	0	0	0	0	0		0		0	0	0	0	0	0		0		0	0	0	0	0	0		0
	Spinal Cord or Dorsal Root Ganglion Neurostimulation Techniques		0	0	0	0	0	0		Without consensus		0	0	0	0	0	0		0		0	0	0	0	0	0		0		0	0	0	0	0	0		0		0	0	0	0	0	0		0
	Spinal Cord or Dorsal Root Ganglion Neurostimulation Techniques. Product / Manufacturer		23	0.478261	0.26087	0.173913	0.0434783	0.0434783		Yes		21	0.47619	0.238095	0.190476	0.047619	0.047619		Yes		0	0	0	0	0	0		0		2	0.5	0.5	0	0	0		Yes		0	0	0	0	0	0		0
	Spinal cord or dorsal root ganglia neurostimulation techniques. Stimulation mode (low/high frequency, BURST bursts, subperceptual, high density, adaptive, etc.)		23	0.826087	0.130435	0.0434783	0	0		Yes		21	0.809524	0.142857	0.047619	0	0		Yes		0	0	0	0	0	0		0		2	1	0	0	0	0		Yes		0	0	0	0	0	0		0
	Spinal cord or dorsal root ganglion neurostimulation techniques. Electrode placement (spinal cord or ganglion)		23	0.913043	0.0434783	0	0.0434783	0		Yes		21	0.904762	0.047619	0	0.047619	0		Yes		0	0	0	0	0	0		0		2	1	0	0	0	0		Yes		0	0	0	0	0	0		0
	Spinal cord or dorsal root ganglia neurostimulation techniques. Electrode length		23	0.521739	0.217391	0.130435	0.0869565	0.0434783		Yes		21	0.52381	0.190476	0.142857	0.0952381	0.047619		Yes		0	0	0	0	0	0		0		2	0.5	0.5	0	0	0		Yes		0	0	0	0	0	0		0
	Spinal Cord or Dorsal Root Ganglion Neurostimulation Techniques. Number of electrodes		23	0.826087	0.173913	0	0	0		Yes		21	0.809524	0.190476	0	0	0		Yes		0	0	0	0	0	0		0		2	1	0	0	0	0		Yes		0	0	0	0	0	0		0
	Spinal Cord or Dorsal Root Ganglion Neurostimulation Techniques. Stimulation Frequency		23	0.695652	0.217391	0.0869565	0	0		Yes		21	0.666667	0.238095	0.0952381	0	0		Yes		0	0	0	0	0	0		0		2	1	0	0	0	0		Yes		0	0	0	0	0	0		0
	Spinal Cord or Dorsal Root Ganglion Neurostimulation Techniques. Pulse Duration		23	0.521739	0.304348	0.173913	0	0		Yes		21	0.52381	0.285714	0.190476	0	0		Yes		0	0	0	0	0	0		0		2	0.5	0.5	0	0	0		Yes		0	0	0	0	0	0		0
	Spinal Cord or Dorsal Root Ganglion Neurostimulation Techniques. Pulse intensity or amplitude		23	0.478261	0.347826	0.173913	0	0		Yes		21	0.52381	0.285714	0.190476	0	0		Yes		0	0	0	0	0	0		0		2	0	1	0	0	0		Yes		0	0	0	0	0	0		0
	Spinal Cord or Dorsal Root Ganglion Neurostimulation Techniques. Impedance		23	0.391304	0.434783	0.173913	0	0		Yes		21	0.380952	0.428571	0.190476	0	0		Yes		0	0	0	0	0	0		0		2	0.5	0.5	0	0	0		Yes		0	0	0	0	0	0		0
	Spinal Cord or Dorsal Root Ganglion Neurostimulation Techniques. Generator: Rechargeable / Non-Rechargeable		23	0.826087	0.0869565	0	0	0.0869565		Yes		21	0.809524	0.0952381	0	0	0.0952381		Yes		0	0	0	0	0	0		0		2	1	0	0	0	0		Yes		0	0	0	0	0	0		0
	Spinal Cord or Dorsal Root Ganglion Neurostimulation Techniques. Battery Life		23	0.478261	0.347826	0.0869565	0.0434783	0.0434783		Yes		21	0.47619	0.333333	0.0952381	0.047619	0.047619		Yes		0	0	0	0	0	0		0		2	0.5	0.5	0	0	0		Yes		0	0	0	0	0	0		0
	Spinal cord or dorsal root ganglia neurostimulation techniques. MRI compatibility.		23	0.826087	0.173913	0	0	0		Yes		21	0.857143	0.142857	0	0	0		Yes		0	0	0	0	0	0		0		2	0.5	0.5	0	0	0		Yes		0	0	0	0	0	0		0
	Spinal Cord or Dorsal Root Ganglion Neurostimulation Techniques. Specialty that implants		23	0.478261	0.391304	0.0434783	0.0869565	0		Yes		21	0.47619	0.380952	0.047619	0.0952381	0		Yes		0	0	0	0	0	0		0		2	0.5	0.5	0	0	0		Yes		0	0	0	0	0	0		0
	Spinal cord or dorsal root ganglia neurostimulation techniques. Approach used for placement: Percutaneous/Surgical		23	0.782609	0.0869565	0.0869565	0	0.0434783		Yes		21	0.761905	0.0952381	0.0952381	0	0.047619		Yes		0	0	0	0	0	0		0		2	1	0	0	0	0		Yes		0	0	0	0	0	0		0
	Spinal Cord or Dorsal Root Ganglion Neurostimulation Techniques. Generator Location (In the final phase)		23	0.826087	0.130435	0.0434783	0	0		Yes		21	0.809524	0.142857	0.047619	0	0		Yes		0	0	0	0	0	0		0		2	1	0	0	0	0		Yes		0	0	0	0	0	0		0
	Spinal Cord or Dorsal Root Ganglion Neurostimulation Techniques. Testing Phase Time		23	0.652174	0.347826	0	0	0		Yes		21	0.666667	0.333333	0	0	0		Yes		0	0	0	0	0	0		0		2	0.5	0.5	0	0	0		Yes		0	0	0	0	0	0		0
	Spinal Cord or Dorsal Root Ganglion Neurostimulation Techniques. Device Lot No.		20	0.1	0.2	0.15	0.15	0.4		Without consensus		19	0.0526316	0.210526	0.157895	0.157895	0.421053		Without consensus		0	0	0	0	0	0		0		1	1	0.5	0.5	0	0		Yes		0	0	0	0	0	0		0
	Spinal Cord or Dorsal Root Ganglion Neurostimulation Techniques.(*) Technical difficulties: Yes/No		25	0.8	0.12	0.04	0	0.04		Yes		23	0.782609	0.130435	0.0434783	0	0.0434783		Yes		0	0	0	0	0	0		0		2	1	0	0	0	0		Yes		0	0	0	0	0	0		0
			0	0	0	0	0	0		0		0	0	0	0	0	0		0		0	0	0	0	0	0		0		0	0	0	0	0	0		0		0	0	0	0	0	0		0
	Radiofrequency Techniques		0	0	0	0	0	0		Without consensus		0	0	0	0	0	0		0		0	0	0	0	0	0		0		0	0	0	0	0	0		0		0	0	0	0	0	0		0
	Radiofrequency Techniques: Variables. Product / Manufacturer		33	0.181818	0.272727	0.272727	0.121212	0.151515		Without consensus		23	0.217391	0.347826	0.173913	0.0869565	0.173913		Without consensus		0	0	0	0	0	0		0		9	0.111111	0.111111	0.444444	0.222222	0.111111		Without consensus		1	0	0	1	0	0		Without consensus
	Radiofrequency Techniques: Variables. Technique Type: Continuous, Conventional, Pulsed, Pulsed with Intracanal Approach....		38	1	0	0	0	0		Yes		26	1	0	0	0	0		Yes		0	0	0	0	0	0		0		11	1	0	0	0	0		Yes		1	1	0	0	0	0		Yes
	Radiofrequency Techniques: Variables.Lot No.		33	0.0606061	0.151515	0.121212	0.151515	0.515152		Without consensus		23	0.0434783	0.130435	0.130435	0.130435	0.565217		Without consensus		0	0	0	0	0	0		0		9	0.111111	0.222222	0.111111	0.111111	0.444444		Without consensus		1	0	1	0	1	1		No
	Radiofrequency Techniques: Variables.Expiration		33	0.212121	0.121212	0.212121	0.151515	0.30303		Without consensus		23	0.217391	0.0869565	0.217391	0.130435	0.347826		Without consensus		0	0	0	0	0	0		0		9	0.222222	0.222222	0.222222	0.111111	0.222222		Without consensus		1	0	1	0	1	1		No
	Radiofrequency Techniques: Variables.Needle Size		38	0.736842	0.236842	0	0	0.0263158		Yes		26	0.807692	0.192308	0	0	0		Yes		0	0	0	0	0	0		0		11	0.545455	0.363636	0	0	0.0909091		Yes		1	1	0	0	0	0		Yes
	Radiofrequency Techniques: Variables. Active tip size		38	0.894737	0.105263	0	0	0		Yes		26	0.923077	0.0769231	0	0	0		Yes		0	0	0	0	0	0		0		11	0.909091	0.0909091	0	0	0		Yes		1	0	1	0	0	0		Yes
	Radiofrequency Techniques: Variables. Straight / curved needle		38	0.578947	0.263158	0.131579	0	0.0263158		Yes		26	0.615385	0.230769	0.115385	0	0.0384615		Yes		0	0	0	0	0	0		0		11	0.545455	0.272727	0.181818	0	0		Yes		1	0	1	0	0	0		Yes
	Radiofrequency Techniques: Variables. Steerable Catheter: Yes/No		38	0.684211	0.263158	0.0526316	0	0		Yes		26	0.769231	0.192308	0.0384615	0	0		Yes		0	0	0	0	0	0		0		11	0.545455	0.363636	0.0909091	0	0		Yes		1	0	1	0	0	0		Yes
	Radiofrequency Techniques: Variables. Total time		38	0.868421	0.0526316	0.0789474	0	0		Yes		26	0.846154	0.0769231	0.0769231	0	0		Yes		0	0	0	0	0	0		0		11	0.909091	0	0.0909091	0	0		Yes		1	1	0	0	0	0		Yes
	Radiofrequency Techniques: Variables.Temperature		38	0.894737	0.0789474	0	0	0.0263158		Yes		26	0.923077	0.0384615	0	0	0.0384615		Yes		0	0	0	0	0	0		0		11	0.818182	0.181818	0	0	0		Yes		1	1	0	0	0	0		Yes
	Radiofrequency Techniques: Variables.Applied voltage		38	0.868421	0.0789474	0.0526316	0	0		Yes		26	0.846154	0.0769231	0.0769231	0	0		Yes		0	0	0	0	0	0		0		11	0.909091	0.0909091	0	0	0		Yes		1	1	0	0	0	0		Yes
	Radiofrequency Techniques: Variables.Pulse Width		33	0.606061	0.212121	0.121212	0.030303	0.030303		Without consensus		23	0.652174	0.173913	0.0869565	0.0434783	0.0434783		Without consensus		0	0	0	0	0	0		0		9	0.444444	0.333333	0.222222	0.0909091	0		Yes		1	1	0	1	0	0		Yes
	Radiofrequency Techniques: Variables. Pulse Repetition Frequency		39	0.641026	0.153846	0.153846	0.0512821	0.0263158		Yes		27	0.62963	0.148148	0.185185	0.037037	0.0384615		Yes		0	0	0	0	0	0		0		11	0.636364	0.181818	0.0909091	0.0909091	0		Yes		1	1	0	0	0	0		Yes
	Radiofrequency Techniques: Variables.Impedance		39	0.410256	0.307692	0.230769	0.025641	0.025641		Yes		27	0.407407	0.37037	0.148148	0.037037	0.037037		Yes		0	0	0	0	0	0		0		11	0.454545	0.181818	0.363636	0.0909091	0		Without consensus		1	1	0	1	0	0		Without consensus
	Radiofrequency Techniques: Variables. Monopolar / Bipolar		38	0.789474	0.105263	0.105263	0	0		Yes		26	0.730769	0.115385	0.153846	0	0		Yes		0	0	0	0	0	0		0		11	0.909091	0.0909091	0	0	0		Yes		1	1	0	0	0	0		Yes
	Radiofrequency Techniques: Variables. Number of treatment locations		38	0.842105	0.157895	0	0	0		Yes		26	0.846154	0.153846	0	0	0		Yes		0	0	0	0	0	0		0		11	0.818182	0.181818	0	0	0		Yes		1	1	0	0	0	0		Yes
	Radiofrequency Techniques: Variables. Anatomical Location		38	0.842105	0.157895	0	0	0		Yes		26	0.884615	0.115385	0	0	0		Yes		0	0	0	0	0	0		0		11	0.727273	0.272727	0	0	0		Yes		1	1	0	0	0	0		Yes
	Radiofrequency Techniques: Variables.(*) Minimum voltage with which sensory stimulation is obtained		39	0.512821	0.384615	0.0512821	0.025641	0.025641		Yes		27	0.407407	0.444444	0.0740741	0.037037	0.037037		Yes		0	0	0	0	0	0		0		11	0.727273	0.272727	0	0	0		Yes		1	1	0	0	0	0		Yes
	Radiofrequency Techniques: Variables.(*) Minimum voltage with which motor stimulation is obtained		39	0.589744	0.307692	0.0512821	0.025641	0.025641		Yes		27	0.481481	0.37037	0.0740741	0.037037	0.037037		Yes		0	0	0	0	0	0		0		11	0.818182	0.181818	0	0	0		Yes		1	1	0	0	0	0		Yes
	Radiofrequency Techniques: Variables.(*) Technical difficulties (Yes/No)		39	0.692308	0.205128	0.0769231	0	0.025641		Yes		27	0.703704	0.222222	0.037037	0	0.037037		Yes		0	0	0	0	0	0		0		11	0.727273	0.0909091	0.181818	0	0		Yes		1	0	1	0	0	0		Yes

## Sheet: B4
	BLOQUE 4: Evaluación del paciente
	Totals	0
	Anesthesiology, Resuscitation and Pain Management	25
	Orthopedic Surgery and Traumatology	5
	Physical Medicine and Rehabilitation	10
	Rheumatology	3
	Weighted average	0
	Weighted average	← Choose the results to display
		5	4	3	2	1
	Definition of follow-up process: Minimum number of follow-ups to be performed	0.155138	0.641798	0.118824	0.0842391	0.347348		Without consensus
	Timing of follow-ups. Minimum time between follow-ups	0	0.13	0.275	0.501667	0.0933333		Without consensus
	Follow-up timing. Maximum response time between follow-ups	0.12	0.285	0.421667	0.113333	0.06		Without consensus
	General information. Find out if the patient, a caregiver, or a family member is answering the survey.	0.140563	0.543314	0.137681	0.178442	0.0454545		Without consensus
	Assessment of patient pain and function. Pain intensity (e.g., EVA-VAS, Brief Pain Inventory,...)	0.895	0.07	0.01	0	0.025		Yes
	Assessment of pain and patient functionality. Assessment of neuropathic pain (e.g., DN4)	0.475	0.336667	0.138333	0	0.05		Yes
	Assessment of the patient's pain and functionality. Functional assessment of the specific area of the body according to the affected area (e.g. KOOS, HOOS, IKDC, Kujala, WOMAC,...): Stiffness, functionality and symptoms	0.285	0.506667	0.173333	0.035	0		Yes
prio2	Assessment of the patient's pain and functionality. Physical examination of the patient: measurement of rotation or range of motion	0.638333	0.143333	0.11	0.108333	0		Yes
	Assessment of patient pain and function. Medication use: Changes in type (analgesics, opioids, adjuvants)	0.628333	0.203333	0.06	0.0833333	0.025		Yes
	Assessment of patient pain and functionality. Medication use: Changes in dose or quantity	0.596667	0.21	0.01	0.0833333	0.1		Yes
	Patient context assessment. Quality of life (e.g. SF-12, EQ-5D,...)	0.127717	0.475214	0.145257	0.230072	0.0217391		Without consensus
	Assessment of the patient's context. Overall self-perceived quality of life	0.0217391	0.179348	0.470026	0.222908	0.105978		Without consensus
	Assessment of the patient's context. General self-perceived health status	0.0444664	0.0335968	0.455369	0.193923	0.272645		Without consensus
	Patient context assessment. Patient psychological status: Anxiety/Depression Scale	0.365	0.371667	0.178333	0.035	0.05		Yes
	Patient context assessment. Sleep quality	0.265	0.411667	0.198333	0.05	0.075		Without consensus
	Patient context assessment. Employment status: Changes in employment status	0.328333	0.345	0.198333	0.128333	0		Without consensus
x	Patient context assessment. Days off work	0.0108696	0.0108696	0.191206	0.635623	0.151433		No
x	Patient context assessment. Days of hospitalization	0.0108696	0.138669	0.23666	0.540431	0.0733696		Without consensus
x	Patient context assessment. Rescue interventional treatment (unplanned): Yes/No	0.378333	0.28	0.08	0.166667	0.095		Without consensus
x	Patient context assessment. Rescue interventional treatment: Days until retreatment	0.0217391	0.162302	0.459074	0.283514	0.0733696		Without consensus
x	Patient context assessment. Daily activity: Changes in intensity - Return to play - Rest days	0.206061	0.523295	0.260227	0.0104167	0.01		Yes
-	Assessment of the patient's context. Health and emotional status of the caregiver	0.13125	0.0852273	0.423295	0.218561	0.141667		Without consensus
x	Evaluation of the patient's context. (*) Physical activity performed: aerobic, weight-bearing, group, individual, with a personal trainer	0.364015	0.510985	0.0416667	0.0833333	0		Yes
x	Evaluation of the patient's context.(*) Physical activity performed: Frequency and duration.	0.314015	0.377652	0.13125	0.177083	0		Without consensus
information of patient	Patient context assessment.(*) Member of a patient association	0.0331439	0.230682	0.359659	0.180682	0.195833		Without consensus
	Patient imaging tests. Radiological or ultrasound follow-up of the patient	0.313447	0.380303	0.245833	0.0604167	0.075		Without consensus
	Patient experience. Overall patient satisfaction	0.358333	0.476667	0.145	0	0.02		Yes
x (planned)	Patient experience. Overall evaluation of the center's facilities	0.02	0.174811	0.243371	0.373864	0.207955		Without consensus
x (planned)	Patient experience. Overall organizational assessment: Access, comprehensiveness, coordination, continuity, and security.	0.0104167	0.280871	0.180871	0.373864	0.153977		Without consensus
x (planned)	Patient experience. Overall evaluation of your caregiver or essential care provider.	0.0208333	0.197538	0.351136	0.243182	0.187311		Without consensus
x (planned)	Patient experience. Overall confidence in the treatment performed	0.237121	0.459091	0.199621	0.0833333	0.0208333		Without consensus
	Complications and adverse effects. Appearance of adverse effects and/or complications	0.945	0.02	0	0.01	0.025		Yes
	Complications and adverse effects. Type of adverse effect	0.745	0.12	0.1	0.01	0.025		Yes
	Complications and adverse effects. Relationship of the adverse effect: product, use or patient	0.75	0.095	0.13	0.025	0		Yes

## Sheet: B3
	BLOCK 3: Treatment variables
	Totals	33
	Anesthesiology, Resuscitation and Pain Management	23
	Orthopedic Surgery and Traumatology	0
	Physical Medicine and Rehabilitation	9
	Rheumatology	1
	Totals	← Choose the results to display
		5	4	3	2	1
	General variables. Date of completion	0.813953	0.116279	0.0465116	0	0.0232558		Yes
	General variables.Responsible physician	0.72093	0.186047	0.0232558	0.0465116	0.0232558		Yes
	General variables. Responsible nursing	0.0952381	0.214286	0.428571	0.119048	0.142857		Without consensus
	Magnetotherapy: Variables. Type of magnetotherapy (PEMF, static, alternating)	0.4	0.4	0.1	0.1	0		Yes
	Magnetotherapy: Variables. Magnetic field intensity	0.3	0.5	0.2	0	0.2		Yes
	Magnetotherapy: Variables. Magnetic field frequency	0.3	0.4	0.1	0	0.2		Yes
	Magnetotherapy: Variables. Waveform	0.142857	0.142857	0.142857	0.285714	0.285714		Without consensus
	Magnetotherapy: Variables. Duration of the magnetic pulse	0.142857	0.285714	0.142857	0.285714	0.142857		Without consensus
	Magnetotherapy: Variables. Polarity of the magnetic pulse	0.1	0.285714	0.428571	0.285714	0.3		Without consensus
	Magnetotherapy: Variables. Equipment used and manufacturer	0.1	0.285714	0.428571	0.142857	0.142857		Without consensus
	Magnetotherapy: Variables. Area of application	0.7	0.3	0	0	0		Yes
	Magnetotherapy: Variables. Distance from the field emission source	0.1	0.142857	0.571429	0.142857	0.142857		Without consensus
	Magnetotherapy: Variables. Impedance and penetration of the magnetic field	0.285714	0.285714	0.1	0.142857	0.285714		Without consensus
	Magnetotherapy: Variables. Applicator or coil size	0.142857	0.142857	0.428571	0.142857	0.142857		Without consensus
	Magnetotherapy: Variables. Number of sessions	0.5	0.5	0	0	0		Yes
	Magnetotherapy: Variables. Interval between sessions	0.4	0.3	0.3	0	0		Yes
	Magnetotherapy: Variables. Duration of each session	0.6	0.3	0.1	0.2	0		Yes
	Shock waves: Variable. Type of shock waves (radial RSWT, focal ESWT)	0.846154	0.153846	0	0	0		Yes
	Shock waves: Variables. Product and manufacturer used	0.0833333	0.3	0.5	0.0833333	0.2		Without consensus
	Shock waves: Variable. Energy applied per pulse	0.846154	0.0769231	0	0	0.0769231		Yes
	Shock waves: Variable. Pulse frequency	0.5	0.25	0.0833333	0.0769231	0.166667		Without consensus
	Shock waves: Variable. Number of impulses per session	0.615385	0.307692	0	0	0.0769231		Yes
	Shock waves: Variables. Pressure waveform	0.0833333	0.666667	0.166667	0.153846	0.0833333		Yes
	Shock waves: Variables. Maximum pressure of the wave	0.384615	0.153846	0.230769	0.0769231	0.153846		Without consensus
	Shock waves: Variable. Application mode: Radial / Focal	0.846154	0.153846	0	0	0		Yes
	Shock waves: Variable. Focal length of the device	0.2	0.2	0.3	0	0.3		Without consensus
	Shock waves: Variables. Area of application	0.923077	0.0769231	0	0	0		Yes
	Shock waves: Variable. Number of sessions	0.692308	0.307692	0	0	0		Yes
	Shock waves: Variables. Interval between sessions	0.538462	0.384615	0.0769231	0	0		Yes
	Shock waves: Variable. Duration of each session	0.3	0.3	0.3	0.153846	0.1		Without consensus
	Shock waves: Variable.(*) Type of Application Head	0.5	0.333333	0.0833333	0	0.0833333		Yes
	Cryotherapy: Variables. Type (whole body WBC, local, pneumatic compression, immersion (ice baths))	0.5	0.285714	0.5	0	0		Without consensus
	Cryotherapy: Variables. Equipment and manufacturer used	0	0.25	0.142857	0.25	0.5		Without consensus
	Cryotherapy: Variables.Temperature	0.75	0.142857	0.25	0.142857	0.142857		Yes
	Cryotherapy: Variables. Tissue cooling rate	0.142857	0.25	0.25	0	0.5		Without consensus
	Cryotherapy: Variables. Cooling method	0.25	0.285714	0.75	0	0.142857		Without consensus
	Cryotherapy: Variables. Area of application	1	0	0	0	0		Yes
	Cryotherapy: Variables. Number of sessions	0.714286	0.285714	0	0	0		Yes
	Cryotherapy: Variables. Interval between sessions	0.428571	0.285714	0.285714	0	0		Yes
	Cryotherapy: Variables. Duration of each session	0.428571	0.285714	0.142857	0.142857	0		Yes
	Physiotherapy or Manual therapy: Variables. Type (massage therapy, joint mobilization, myofascial therapy, combination)	0.923077	0.0769231	0	0	0		Yes
	Physiotherapy or Manual Therapy: Variables. Associated strengthening exercises	0.846154	0.0769231	0.0769231	0	0		Yes
	Physiotherapy or manual therapy: Variables. Area of application	0.769231	0.230769	0	0	0		Yes
	Physiotherapy or Manual Therapy: Variables. Number of sessions	0.692308	0.230769	0.0769231	0	0		Yes
	Physiotherapy or Manual Therapy: Variables. Interval between sessions	0.538462	0.230769	0.230769	0	0		Yes
	Physiotherapy or Manual Therapy: Variables. Duration of each session	0.166667	0.75	0.0833333	0.153846	0		Yes
	Dry needling: Variables.Needle length	0.333333	0.166667	0.1	0.1	0.5		Without consensus
	Dry needling: Variables. Needle gauge	0.285714	0.142857	0.142857	0	0.428571		Without consensus
	Dry needling: Variables. Material and type of needle	0.166667	0.166667	0.166667	0.2	0.5		Without consensus
	Dry needling: Variables. Insertion time	0.333333	0.3	0.5	0	0.166667		Without consensus
	Dry needling: Variables. Stimulation with movements (Fanning): Yes/No	0.285714	0.142857	0.285714	0.142857	0.142857		Without consensus
	Dry needling: Variables. Area of application	0.857143	0.142857	0	0	0		Yes
	Dry needling: Variables. Number of sessions	0.857143	0.142857	0	0	0		Yes
	Dry needling: Variables. Interval between sessions	0.428571	0.571429	0	0	0		Yes
	Dry needling: Variables. Duration of each session	0.333333	0.166667	0.5	0	0.1		Without consensus
	Rest: Variables.Duration	0.653846	0.269231	0.0769231	0	0		Yes
	Rest: Variables. Rest type: Absolute / Relative	0.807692	0.153846	0.0384615	0	0		Yes
	Rest: Variables. Mobilization: No / Passive / Controlled	0.653846	0.230769	0.0769231	0	0.0384615		Yes
	Rest: Variables.(*) Rest duration time	0.518519	0.296296	0.148148	0	0.037037		Yes
	Rest: Variables.(*) Daily rest time	0.37037	0.222222	0.296296	0.037037	0.0740741		Without consensus
	Rest: Variables.(*) Associated exercises	0.592593	0.333333	0.037037	0	0.037037		Yes
	Infiltrations or Blockages: Variables. Group of medication used	0.883721	0.0232558	0.0697674	0	0.0232558		Yes
	Infiltrations or Blockages: Variables. Name of the medication / Active ingredient	0.883721	0.0697674	0.0465116	0	0		Yes
	Infiltrations or Blockages: Variables. Manufacturer	0.05	0.175	0.475	0.075	0.225		Without consensus
	Infiltrations or Blockages: Variables. Concomitant medication or substance	0.55814	0.27907	0.0697674	0.0697674	0.0232558		Yes
	Infiltrations or Blockages: Variables. Expected administered dose	0.697674	0.186047	0.0697674	0.0232558	0.0232558		Yes
	Infiltrations or Blockages: Variables. Expected administered volume	0.534884	0.302326	0.116279	0.0232558	0.0232558		Yes
	Infiltrations or Blockages: Variables. Dose magnitude (mg, ml, concentration, ...)	0.744186	0.209302	0.0465116	0	0		Yes
	Infiltrations or Blockages: Variables. Lot	0.05	0.025	0.25	0.15	0.525		Without consensus
	Infiltrations or Blockages: Variables. Expiration Date	0.35	0.175	0.15	0.1	0.225		Without consensus
	Infiltrations or Blockages: Variables. Number of infiltration locations	0.744186	0.139535	0.0697674	0	0.0465116		Yes
	Infiltrations or Blockages: Variables. Type of infiltrated tissue	0.767442	0.139535	0.0232558	0.0232558	0.0465116		Yes
	Infiltrations or Blockages: Variables. Anatomical location	0.883721	0.116279	0	0	0		Yes
	Infiltrations or Blockages: Variables. Final volume administered	0.744186	0.139535	0.116279	0	0		Yes
	Infiltrations or Blockages: Variables. Final dose administered	0.790698	0.162791	0.0232558	0.0232558	0		Yes
	Infiltrations or Blockages: Variables. Image-guided (No, ultrasound, fluoroscope,...)	0.930233	0.0697674	0	0	0		Yes
	Infiltration of Blood Products: Variables 1 (Collection and Analysis). Initial blood volume	0.609756	0.146341	0.146341	0.0243902	0.0731707		Yes
	Infiltration of blood products: Variables 1 (Collection and Analysis). Quantity of anticoagulant	0.263158	0.394737	0.157895	0.0526316	0.131579		Without consensus
	Infiltration of blood products: Variables 1 (Collection and Analysis). Anticoagulant units (% or mg)	0.236842	0.236842	0.315789	0.0789474	0.131579		Without consensus
	Infiltration of blood products: Variables 1 (Collection and Analysis). Type of anticoagulant	0.5	0.210526	0.131579	0.0526316	0.105263		Without consensus
	Infiltration of Blood Products: Variables 1 (Collection and Analysis). Type of system (Open/Closed)	0.631579	0.131579	0.157895	0.0263158	0.0526316		Yes
	Infiltration of Blood Products: Variables 1 (Collection and Analysis). Product / Manufacturer used	0.342105	0.315789	0.184211	0.0526316	0.105263		Without consensus
	Infiltration of Blood Products: Variables 1 (Collection and Analysis). Device lot number	0.0526316	0.184211	0.157895	0.157895	0.447368		Without consensus
	Infiltration of blood products: Variables 1 (Collection and Analysis). Device expiration date	0.315789	0.131579	0.236842	0.0789474	0.236842		Without consensus
	Infiltration of blood products: Variables 1 (Collection and Analysis). Number of centrifugations	0.342105	0.210526	0.263158	0.105263	0.0789474		Without consensus
	Infiltration of Blood Products: Variables 1 (Collection and Analysis). Centrifugation speed and time	0.536585	0.170732	0.170732	0.0731707	0.0487805		Without consensus
	Infiltration of Blood Products: Variables 1 (Collection and Analysis). Type of centrifuge used	0.236842	0.210526	0.394737	0.0526316	0.105263		Without consensus
	Infiltration of blood products: Variables 1 (Collection and Analysis). Final volume of PRP obtained	0.868421	0.131579	0	0	0		Yes
	Infiltration of blood products: Variables 1 (Collection and Analysis). Final appearance of the PRP	0.447368	0.315789	0.210526	0	0.0263158		Yes
	Infiltration of blood products: Variables 1 (Collection and Analysis). Analysis of the patient's whole blood (cell concentrations)	0.421053	0.263158	0.184211	0.0789474	0.0526316		Without consensus
	Infiltration of blood products: Variables 1 (Collection and Analysis). Analysis of the plasma sample (cell concentrations)	0.578947	0.236842	0.105263	0.0526316	0.0263158		Yes
	Infiltration of blood products: Variables 1 (Collection and Analysis). Plasma activation	0.578947	0.236842	0.131579	0	0.0526316		Yes
	Infiltration of blood products: Variables 1 (Collection and Analysis). Type of activator	0.447368	0.263158	0.131579	0.105263	0.0526316		Yes
	Infiltration of blood products: Variables 1 (Collection and Analysis). Quantity of activator	0.447368	0.131579	0.315789	0.0263158	0.0789474		Without consensus
	Infiltration of blood products: Variables 1 (Collection and Analysis). Final form of the product (clot, liquid, eye drops, etc.)	0.5	0.236842	0.157895	0.0526316	0.0526316		Yes
	Infiltration of blood products: Variables 2 (Infiltration). Number of infiltration locations	0.789474	0.157895	0.0263158	0	0.0263158		Yes
	Infiltration of blood products: Variables 2 (Infiltration). Type of infiltrated tissue	0.789474	0.131579	0.0263158	0.0263158	0.0263158		Yes
	Infiltration of blood products: Variables 2 (Infiltration). Anatomical location	0.868421	0.131579	0	0	0		Yes
	Infiltration of blood products: Variables 2 (Infiltration). Volume administered	0.815789	0.131579	0.0526316	0	0		Yes
	Infiltration of blood products: Variables 2 (Infiltration). Administered dose	0.842105	0.105263	0.0263158	0	0.0263158		Yes
	Infiltration of blood products: Variables 2 (Infiltration). Image-guided (No, ultrasound, fluoroscope, ...)	0.894737	0.105263	0	0	0		Yes
	Infiltration of blood products: Variables 1 (Collection and Analysis).(*) Technical difficulties: Yes/No	0.609756	0.195122	0.170732	0	0.0243902		Yes
	Electrical neuromodulation techniques: TENS (variables). Product / Manufacturer	0.12	0.28	0.12	0.08	0.4		Without consensus
	Electrical neuromodulation techniques: TENS (variables). Stimulation frequency	0.48	0.24	0.16	0.08	0.04		Yes
	Electrical neuromodulation techniques: TENS (variables). Pulse width	0.4	0.36	0.12	0.08	0.04		Yes
	Electrical neuromodulation techniques: TENS (variables). Intensity perceived by the patient	0.518519	0.185185	0.111111	0.111111	0.0740741		Without consensus
	Electrical neuromodulation techniques: TENS (variables). Current type: Biphasic / Monophasic / Alternating	0.4	0.44	0.08	0.04	0.04		Yes
	Electrical neuromodulation techniques: TENS (variables). Device allows modulation of intensity / amplitude / frequency: Yes / No	0.52	0.2	0.16	0.04	0.08		Without consensus
	Electrical neuromodulation techniques: TENS (variables). Session duration	0.48	0.28	0.16	0.04	0.04		Yes
	Electrical neuromodulation techniques: TENS (variables). Treatment frequency	0.64	0.24	0.12	0	0		Yes
	Electrical neuromodulation techniques: TENS (variables). Location	0.8	0.16	0.04	0	0		Yes
	Electrical neuromodulation techniques: TENS (variables). Device lot no.	0.037037	0.111111	0.148148	0.148148	0.555556		Without consensus
	Spinal Cord or Dorsal Root Ganglion Neurostimulation Techniques. Product / Manufacturer	0.478261	0.26087	0.173913	0.0434783	0.0434783		Yes
	Spinal cord or dorsal root ganglia neurostimulation techniques. Stimulation mode (low/high frequency, BURST bursts, subperceptual, high density, adaptive, etc.)	0.826087	0.130435	0.0434783	0	0		Yes
	Spinal cord or dorsal root ganglion neurostimulation techniques. Electrode placement (spinal cord or ganglion)	0.913043	0.0434783	0	0.0434783	0		Yes
	Spinal cord or dorsal root ganglia neurostimulation techniques. Electrode length	0.521739	0.217391	0.130435	0.0869565	0.0434783		Yes
	Spinal Cord or Dorsal Root Ganglion Neurostimulation Techniques. Number of electrodes	0.826087	0.173913	0	0	0		Yes
	Spinal Cord or Dorsal Root Ganglion Neurostimulation Techniques. Stimulation Frequency	0.695652	0.217391	0.0869565	0	0		Yes
	Spinal Cord or Dorsal Root Ganglion Neurostimulation Techniques. Pulse Duration	0.521739	0.304348	0.173913	0	0		Yes
	Spinal Cord or Dorsal Root Ganglion Neurostimulation Techniques. Pulse intensity or amplitude	0.478261	0.347826	0.173913	0	0		Yes
	Spinal Cord or Dorsal Root Ganglion Neurostimulation Techniques. Impedance	0.391304	0.434783	0.173913	0	0		Yes
	Spinal Cord or Dorsal Root Ganglion Neurostimulation Techniques. Generator: Rechargeable / Non-Rechargeable	0.826087	0.0869565	0	0	0.0869565		Yes
	Spinal Cord or Dorsal Root Ganglion Neurostimulation Techniques. Battery Life	0.478261	0.347826	0.0869565	0.0434783	0.0434783		Yes
	Spinal cord or dorsal root ganglia neurostimulation techniques. MRI compatibility.	0.826087	0.173913	0	0	0		Yes
	Spinal Cord or Dorsal Root Ganglion Neurostimulation Techniques. Specialty that implants	0.478261	0.391304	0.0434783	0.0869565	0		Yes
	Spinal cord or dorsal root ganglia neurostimulation techniques. Approach used for placement: Percutaneous/Surgical	0.782609	0.0869565	0.0869565	0	0.0434783		Yes
	Spinal Cord or Dorsal Root Ganglion Neurostimulation Techniques. Generator Location (In the final phase)	0.826087	0.130435	0.0434783	0	0		Yes
	Spinal Cord or Dorsal Root Ganglion Neurostimulation Techniques. Testing Phase Time	0.652174	0.347826	0	0	0		Yes
	Spinal Cord or Dorsal Root Ganglion Neurostimulation Techniques. Device lot No.	0.1	0.2	0.15	0.15	0.4		Without consensus
	Spinal Cord or Dorsal Root Ganglion Neurostimulation Techniques.(*) Technical difficulties: Yes/No	0.8	0.12	0.04	0	0.04		Yes
	Radiofrequency Techniques: Variables. Product / Manufacturer	0.181818	0.272727	0.272727	0.121212	0.151515		Without consensus
	Radiofrequency Techniques: Variables. Technique Type: Continuous, Conventional, Pulsed, Pulsed with Intracanal Approach....	1	0	0	0	0		Yes
	Radiofrequency Techniques: Variables. lot No.	0.0606061	0.151515	0.121212	0.151515	0.515152		Without consensus
	Radiofrequency Techniques: Variables.Expiration	0.212121	0.121212	0.212121	0.151515	0.30303		Without consensus
	Radiofrequency Techniques: Variables.Needle Size	0.736842	0.236842	0	0	0.0263158		Yes
	Radiofrequency Techniques: Variables. Active tip size	0.894737	0.105263	0	0	0		Yes
	Radiofrequency Techniques: Variables. Straight / curved needle	0.578947	0.263158	0.131579	0	0.0263158		Yes
	Radiofrequency Techniques: Variables. Steerable Catheter: Yes/No	0.684211	0.263158	0.0526316	0	0		Yes
	Radiofrequency Techniques: Variables. Total time	0.868421	0.0526316	0.0789474	0	0		Yes
	Radiofrequency Techniques: Variables.Temperature	0.894737	0.0789474	0	0	0.0263158		Yes
	Radiofrequency Techniques: Variables.Applied voltage	0.868421	0.0789474	0.0526316	0	0		Yes
	Radiofrequency Techniques: Variables.Pulse Width	0.606061	0.212121	0.121212	0.030303	0.030303		Without consensus
	Radiofrequency Techniques: Variables. Pulse Repetition Frequency	0.641026	0.153846	0.153846	0.0512821	0.0263158		Yes
	Radiofrequency Techniques: Variables.Impedance	0.410256	0.307692	0.230769	0.025641	0.025641		Yes
	Radiofrequency Techniques: Variables. Monopolar / Bipolar	0.789474	0.105263	0.105263	0	0		Yes
	Radiofrequency Techniques: Variables. Number of treatment locations	0.842105	0.157895	0	0	0		Yes
	Radiofrequency Techniques: Variables. Anatomical Location	0.842105	0.157895	0	0	0		Yes
	Radiofrequency Techniques: Variables.(*) Minimum voltage with which sensory stimulation is obtained	0.512821	0.384615	0.0512821	0.025641	0.025641		Yes
	Radiofrequency Techniques: Variables.(*) Minimum voltage with which motor stimulation is obtained	0.589744	0.307692	0.0512821	0.025641	0.025641		Yes
	Radiofrequency Techniques: Variables.(*) Technical difficulties (Yes/No)	0.692308	0.205128	0.0769231	0	0.025641		Yes

## Sheet: B4D
			Totals	5	4	3	2	1				Anesthesiology, Resuscitation and Pain Management	5	4	3	2	1				Orthopedic Surgery and Traumatology	5	4	3	2	1				Physical Medicine and Rehabilitation	5	4	3	2	1				Rheumatology	5	4	3	2	1				Weighted average	5
	Definition of follow-up process: Minimum number of follow-ups to be performed		0	0.268293	0.560976	0.097561	0.0731707	0.27907		Without consensus		23	0.347826	0.521739	0.0434783	0.0869565	0.25		Without consensus		4	0	0.5	0.25	0.25	0.2		Without consensus		11	0.272727	0.545455	0.181818	0.454545	0.272727		Yes		3	0	1	0.333333	0.333333	0.666667		Yes			0.155138
	Timing of follow-ups. Minimum time between follow-ups		0	0	0.139535	0.44186	0.372093	0.0465116		Without consensus		25	0	0.12	0.6	0.24	0.04		Without consensus		5	0	0.2	0.2	0.6	0		Without consensus		10	0	0.2	0.3	0.5	0		Without consensus		3	0	0	0	0.666667	0.333333		No			0
	Follow-up timing. Maximum response time between follow-ups		0	0.116279	0.395349	0.348837	0.0930233	0.0465116		Without consensus		25	0.08	0.44	0.32	0.12	0.04		Without consensus		5	0.2	0.2	0.4	0	0.2		Without consensus		10	0.2	0.5	0.3	0	0		Yes		3	0	0	0.666667	0.333333	0		Without consensus			0.12
	General information. Find out if the patient, a caregiver, or a family member is answering the survey.		0	0.146341	0.585366	0.146341	0.121951	0.0465116		Without consensus		23	0.130435	0.521739	0.217391	0.130435	0.04		Without consensus		4	0.25	0.5	0.2	0.25	0.2		Without consensus		11	0.181818	0.818182	0.0909091	0.3	0.181818		Yes		3	0	0.333333	0.333333	0.333333	0		Without consensus			0.140563
	Assessment of patient pain and function. Pain intensity (e.g., EVA-VAS, Brief Pain Inventory,...)		0	0.860465	0.0930233	0.0232558	0	0.0232558		Yes		25	0.88	0.08	0.04	0	0		Yes		5	1	0	0	0	0		Yes		10	0.7	0.2	0	0	0.1		Yes		3	1	0	0	0	0		Yes			0.895
	Assessment of pain and patient functionality. Assessment of neuropathic pain (e.g., DN4)		0	0.581395	0.27907	0.116279	0	0.0232558		Yes		25	0.6	0.28	0.12	0	0		Yes		5	0.6	0.2	0	0	0.2		Yes		10	0.7	0.2	0.1	0	0		Yes		3	0	0.666667	0.333333	0	0		Without consensus			0.475
	Assessment of the patient's pain and functionality. Functional assessment of the specific area of the body according to the affected area (e.g. KOOS, HOOS, IKDC, Kujala, WOMAC,...): Stiffness, functionality and symptoms		0	0.348837	0.465116	0.139535	0.0465116	0		Yes		25	0.44	0.36	0.16	0.04	0		Yes		5	0.6	0.2	0.2	0	0		Yes		10	0.1	0.8	0	0.1	0		Yes		3	0	0.666667	0.333333	0	0		Without consensus			0.285
	Assessment of the patient's pain and functionality. Physical examination of the patient: measurement of rotation or range of motion		0	0.72093	0.162791	0.0697674	0.0465116	0		Yes		25	0.72	0.24	0.04	0	0		Yes		5	0.6	0	0.4	0	0		Without consensus		10	0.9	0	0	0.1	0		Yes		3	0.333333	0.333333	0	0.333333	0		Without consensus			0.638333
	Assessment of patient pain and function. Medication use: Changes in type (analgesics, opioids, adjuvants)		0	0.767442	0.139535	0.0465116	0.0232558	0.0232558		Yes		25	0.88	0.08	0.04	0	0		Yes		5	0.6	0.2	0.2	0	0		Yes		10	0.7	0.2	0	0	0.1		Yes		3	0.333333	0.333333	0	0.333333	0		Without consensus			0.628333
	Assessment of patient pain and functionality. Medication use: Changes in dose or quantity		0	0.651163	0.232558	0.0232558	0.0232558	0.0697674		Yes		25	0.72	0.24	0.04	0	0		Yes		5	0.4	0.4	0	0	0.2		Yes		10	0.6	0.2	0	0	0.2		Yes		3	0.666667	0	0	0.333333	0		Without consensus			0.596667
	Patient context assessment. Quality of life (e.g. SF-12, EQ-5D,...)		0	0.170732	0.439024	0.219512	0.121951	0.0487805		Without consensus		23	0.26087	0.347826	0.217391	0.0869565	0.0869565		Without consensus		4	0.25	0.25	0.2	0.5	0.2		Without consensus		11	0.272727	0.636364	0.363636	0.1	0		Without consensus		3	0	0.666667	0.333333	0.333333	0		Without consensus			0.127717
	Assessment of the patient's context. Overall self-perceived quality of life		0	0.0487805	0.170732	0.463415	0.195122	0.121951		Without consensus		23	0.0869565	0.217391	0.304348	0.217391	0.173913		Without consensus		4	0.2	0.5	0.2	0.25	0.25		Without consensus		11	0.363636	0.636364	0.909091	0.0909091	0		Without consensus		3	0.333333	0.666667	0.666667	0.333333	0		Without consensus			0.0217391
	Assessment of the patient's context. General self-perceived health status		0	0.0731707	0.0487805	0.414634	0.292683	0.170732		Without consensus		23	0.0869565	0.0434783	0.26087	0.434783	0.173913		Without consensus		4	0	0.6	0.5	0.25	0.25		Without consensus		11	0.0909091	0.0909091	0.727273	0.0909091	0		Without consensus		3	0	0.666667	0.333333	0.333333	0.666667		Without consensus			0.0444664
	Patient context assessment. Patient psychological status: Anxiety/Depression Scale		0	0.488372	0.325581	0.116279	0.0465116	0.0232558		Yes		25	0.56	0.32	0.08	0.04	0		Yes		5	0.4	0.2	0.2	0	0.2		Without consensus		10	0.5	0.3	0.1	0.1	0		Yes		3	0	0.666667	0.333333	0	0		Without consensus			0.365
	Patient context assessment. Sleep quality		0	0.418605	0.348837	0.162791	0.0232558	0.0465116		Yes		25	0.56	0.28	0.16	0	0		Yes		5	0.2	0.2	0.2	0.2	0.2		Without consensus		10	0.3	0.5	0.1	0	0.1		Yes		3	0	0.666667	0.333333	0	0		Without consensus			0.265
	Patient context assessment. Employment status: Changes in employment status		0	0.395349	0.348837	0.162791	0.0930233	0		Yes		25	0.48	0.28	0.16	0.08	0		Yes		5	0.2	0.6	0.2	0	0		Yes		10	0.3	0.5	0.1	0.1	0		Yes		3	0.333333	0	0.333333	0.333333	0		Without consensus			0.328333
	Patient context assessment. Days off work		0	0.0243902	0.0243902	0.170732	0.609756	0.170732		No		23	0.0434783	0.0434783	0.173913	0.565217	0.173913		Without consensus		4	0.2	0.4	0.5	0.25	0.25		Without consensus		11	0.181818	0.636364	0.0909091	0.727273	0.181818		No		3	0	0.333333	0.333333	1	0		No			0.0108696
	Patient context assessment. Days of hospitalization		0	0.0243902	0.121951	0.219512	0.585366	0.0487805		Without consensus		23	0.0434783	0.130435	0.173913	0.608696	0.0434783		Without consensus		4	0.2	0.4	0.5	0.25	0.25		Without consensus		11	0.1	0.0909091	0.272727	0.636364	0		Without consensus		3	0.333333	0.333333	0.333333	0.666667	0		Without consensus			0.0108696
	Patient context assessment. Rescue interventional treatment (unplanned): Yes/No		0	0.418605	0.348837	0.0930233	0.0465116	0.0930233		Yes		25	0.48	0.32	0.12	0	0.08		Yes		5	0.4	0.2	0.2	0	0.2		Without consensus		10	0.3	0.6	0	0	0.1		Yes		3	0.333333	0	0	0.666667	0		Without consensus			0.378333
	Patient context assessment. Rescue interventional treatment: Days until retreatment		0	0.0487805	0.195122	0.512195	0.195122	0.0487805		Without consensus		23	0.0869565	0.217391	0.434783	0.217391	0.0434783		Without consensus		4	0.4	0.25	0.25	0.25	0.25		Without consensus		11	0.272727	0.181818	0.818182	0	0		Without consensus		3	0.333333	0.333333	0.333333	0.666667	0		Without consensus			0.0217391
	Patient context assessment. Daily activity: Changes in intensity - Return to play - Rest days		0	0.255814	0.581395	0.139535	0.0232558	0.0232558		Yes		24	0.333333	0.541667	0.0833333	0.0416667	0.04		Yes		5	0.4	0.4	0.2	0	0		Yes		11	0.0909091	0.818182	0.0909091	0.1	0		Yes		3	0	0.333333	0.666667	0.333333	0		Without consensus			0.206061
	Assessment of the patient's context. Health and emotional status of the caregiver		0	0.116279	0.162791	0.372093	0.209302	0.139535		Without consensus		24	0.125	0.25	0.208333	0.25	0.166667		Without consensus		5	0.4	0.2	0	0.2	0.4		Without consensus		11	0.1	0.0909091	0.818182	0.0909091	0		Without consensus		3	0	0	0.666667	0.333333	0		Without consensus			0.13125
	Evaluation of the patient's context. (*) Physical activity performed: aerobic, weight-bearing, group, individual, with a personal trainer		0	0.302326	0.581395	0.0930233	0.0232558	0		Yes		24	0.25	0.583333	0.166667	0	0		Yes		5	0.6	0.4	0	0	0		Yes		11	0.272727	0.727273	0	0	0		Yes		3	0.333333	0.333333	0	0.333333	0		Without consensus			0.364015
	Evaluation of the patient's context.(*) Physical activity performed: Frequency and duration.		0	0.27907	0.534884	0.116279	0.0697674	0		Yes		24	0.25	0.583333	0.125	0.0416667	0		Yes		5	0.4	0.2	0.4	0	0		Without consensus		11	0.272727	0.727273	0	0	0		Yes		3	0.333333	0	0	0.666667	0		Without consensus			0.314015
	Patient context assessment.(*) Member of a patient association		0	0.0465116	0.255814	0.27907	0.232558	0.186047		Without consensus		24	0.0416667	0.25	0.208333	0.25	0.25		Without consensus		5	0	0.4	0.2	0.2	0.2		Without consensus		11	0.0909091	0.272727	0.363636	0.272727	0		Without consensus		3	0	0	0.666667	0	0.333333		Without consensus			0.0331439
	Patient imaging tests. Radiological or ultrasound follow-up of the patient		0	0.372093	0.372093	0.209302	0.0465116	0.0465116		Yes		24	0.375	0.333333	0.25	0.0416667	0		Yes		5	0	0.4	0.4	0.2	0.2		Without consensus		11	0.545455	0.454545	0.2	0	0.1		Yes		3	0.333333	0.333333	0.333333	0.333333	0		Without consensus			0.313447
	Patient experience. Overall patient satisfaction		0	0.372093	0.44186	0.139535	0	0.0465116		Yes		25	0.4	0.44	0.08	0	0.08		Yes		5	0.4	0.4	0.2	0	0		Yes		10	0.3	0.4	0.3	0	0		Yes		3	0.333333	0.666667	0	0	0		Yes			0.358333
	Patient experience. Overall evaluation of the center's facilities		0	0.0465116	0.186047	0.162791	0.418605	0.232558		Without consensus		24	0.08	0.208333	0.125	0.416667	0.25		Without consensus		5	0	0.4	0	0.2	0.4		Without consensus		11	0	0.0909091	0.181818	0.545455	0.181818		No		3	0	0	0.666667	0.333333	0		Without consensus			0.02
	Patient experience. Overall organizational assessment: Access, comprehensiveness, coordination, continuity, and security.		0	0.0232558	0.232558	0.186047	0.418605	0.139535		Without consensus		24	0.0416667	0.208333	0.208333	0.416667	0.125		Without consensus		5	0	0.4	0.4	0.2	0.4		Without consensus		11	0	0.181818	0.181818	0.545455	0.0909091		Without consensus		3	0	0.333333	0.333333	0.333333	0		Without consensus			0.0104167
	Patient experience. Overall evaluation of your caregiver or essential care provider.		0	0.0465116	0.209302	0.395349	0.209302	0.139535		Without consensus		24	0.0833333	0.208333	0.416667	0.166667	0.125		Without consensus		5	0	0.4	0.2	0.2	0.2		Without consensus		11	0.1	0.181818	0.454545	0.272727	0.0909091		Without consensus		3	0	0	0.333333	0.333333	0.333333		Without consensus			0.0208333
	Patient experience. Overall confidence in the treatment performed		0	0.209302	0.581395	0.139535	0.0232558	0.0465116		Yes		24	0.166667	0.666667	0.0833333	0.2	0.0833333		Yes		5	0.6	0.2	0.2	0.2	0		Yes		11	0.181818	0.636364	0.181818	0.1	0.1		Yes		3	0	0.333333	0.333333	0.333333	0		Without consensus			0.237121
	Complications and adverse effects. Appearance of adverse effects and/or complications		0	0.906977	0.0465116	0	0.0232558	0.0232558		Yes		25	0.88	0.08	0	0.04	0		Yes		5	1	0	0	0	0		Yes		10	0.9	0	0	0	0.1		Yes		3	1	0	0	0	0		Yes			0.945
	Complications and adverse effects. Type of adverse effect		0	0.790698	0.116279	0.0465116	0.0232558	0.0232558		Yes		25	0.88	0.08	0	0.04	0		Yes		5	0.4	0.2	0.4	0	0		Without consensus		10	0.7	0.2	0	0	0.1		Yes		3	1	0	0	0	0		Yes			0.745
	Complications and adverse effects. Relationship of the adverse effect: product, use or patient		0	0.767442	0.0930233	0.116279	0.0232558	0		Yes		25	0.8	0.08	0.12	0	0		Yes		5	0.4	0.2	0.4	0	0		Without consensus		10	0.8	0.1	0	0.1	0		Yes		3	1	0	0	0	0		Yes			0.75
[truncated: 5 more columns]
